# Supplementary figures and images for: Myosin V executes steps of variable length via structurally constrained diffusion
Source: eLife journal article supplement (doi:10.7554/elife.51569), 2020-01-15

# Analytical Theory

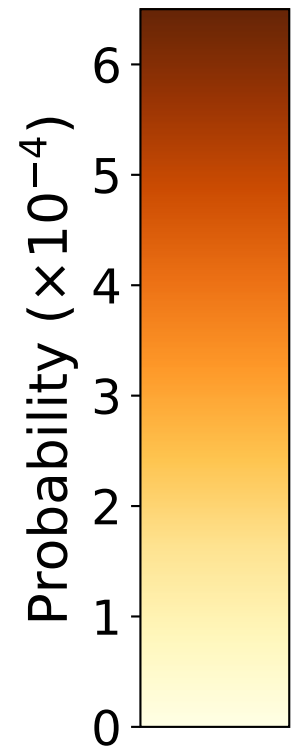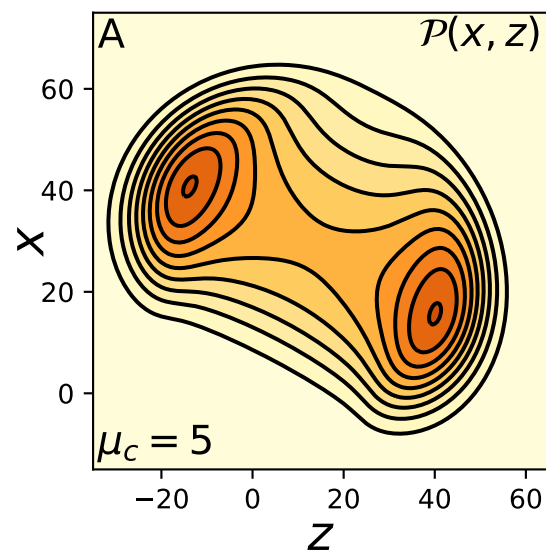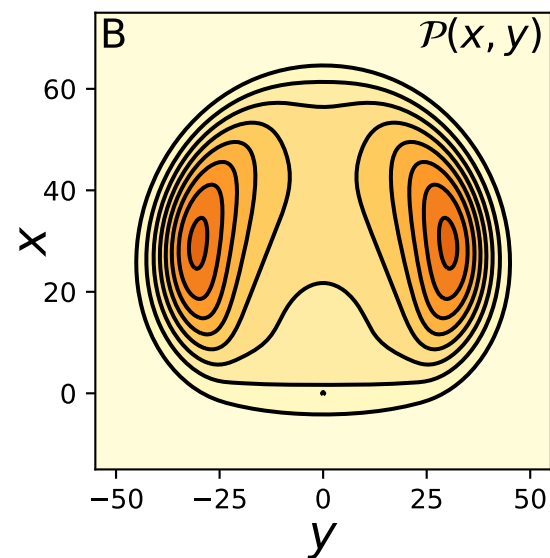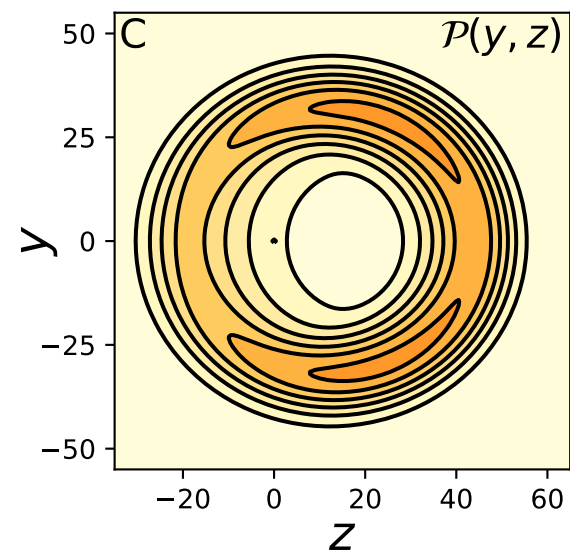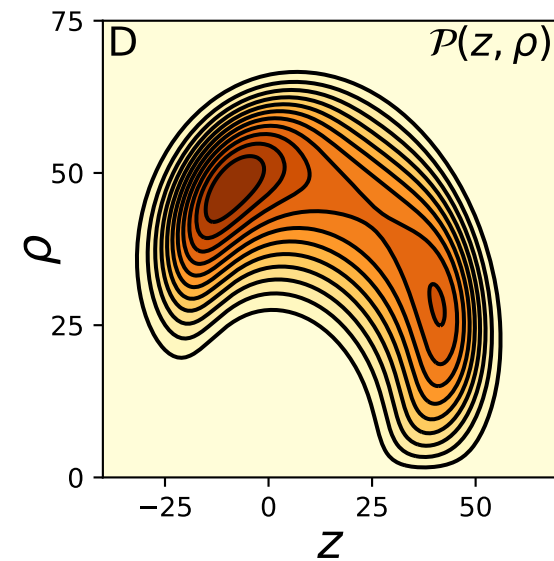

# Brownian Dynamics Simulations

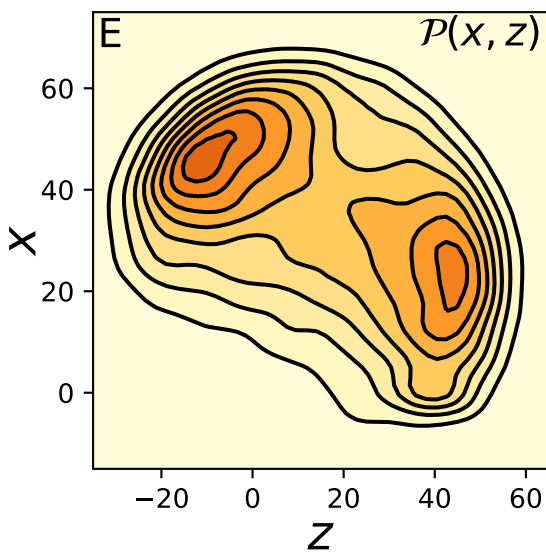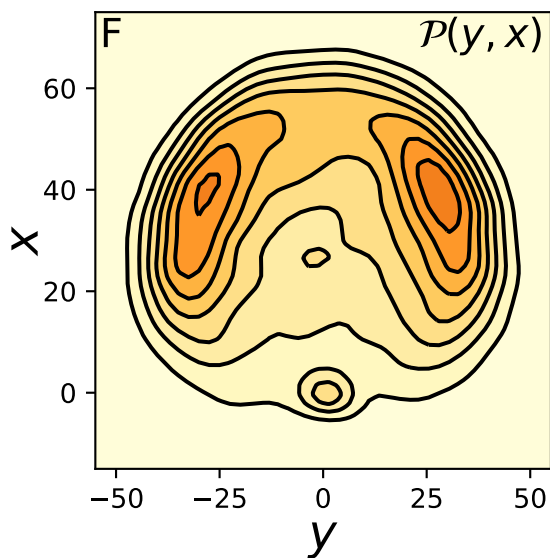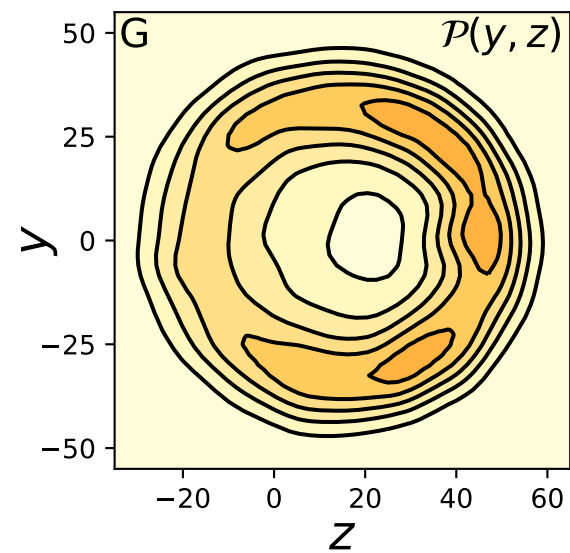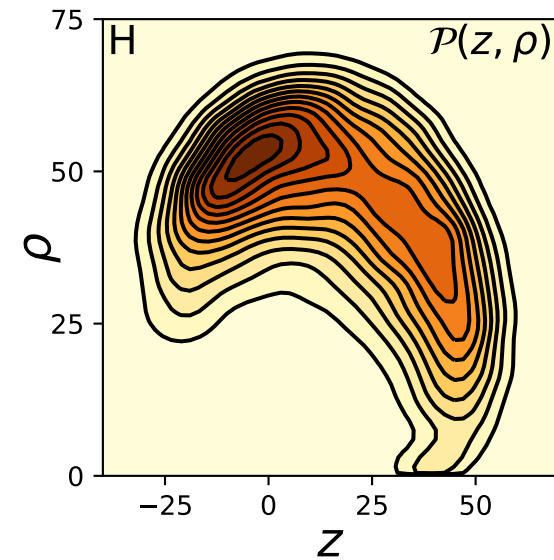

Supplement: supp [file elife-51569-supp-v1.zip]

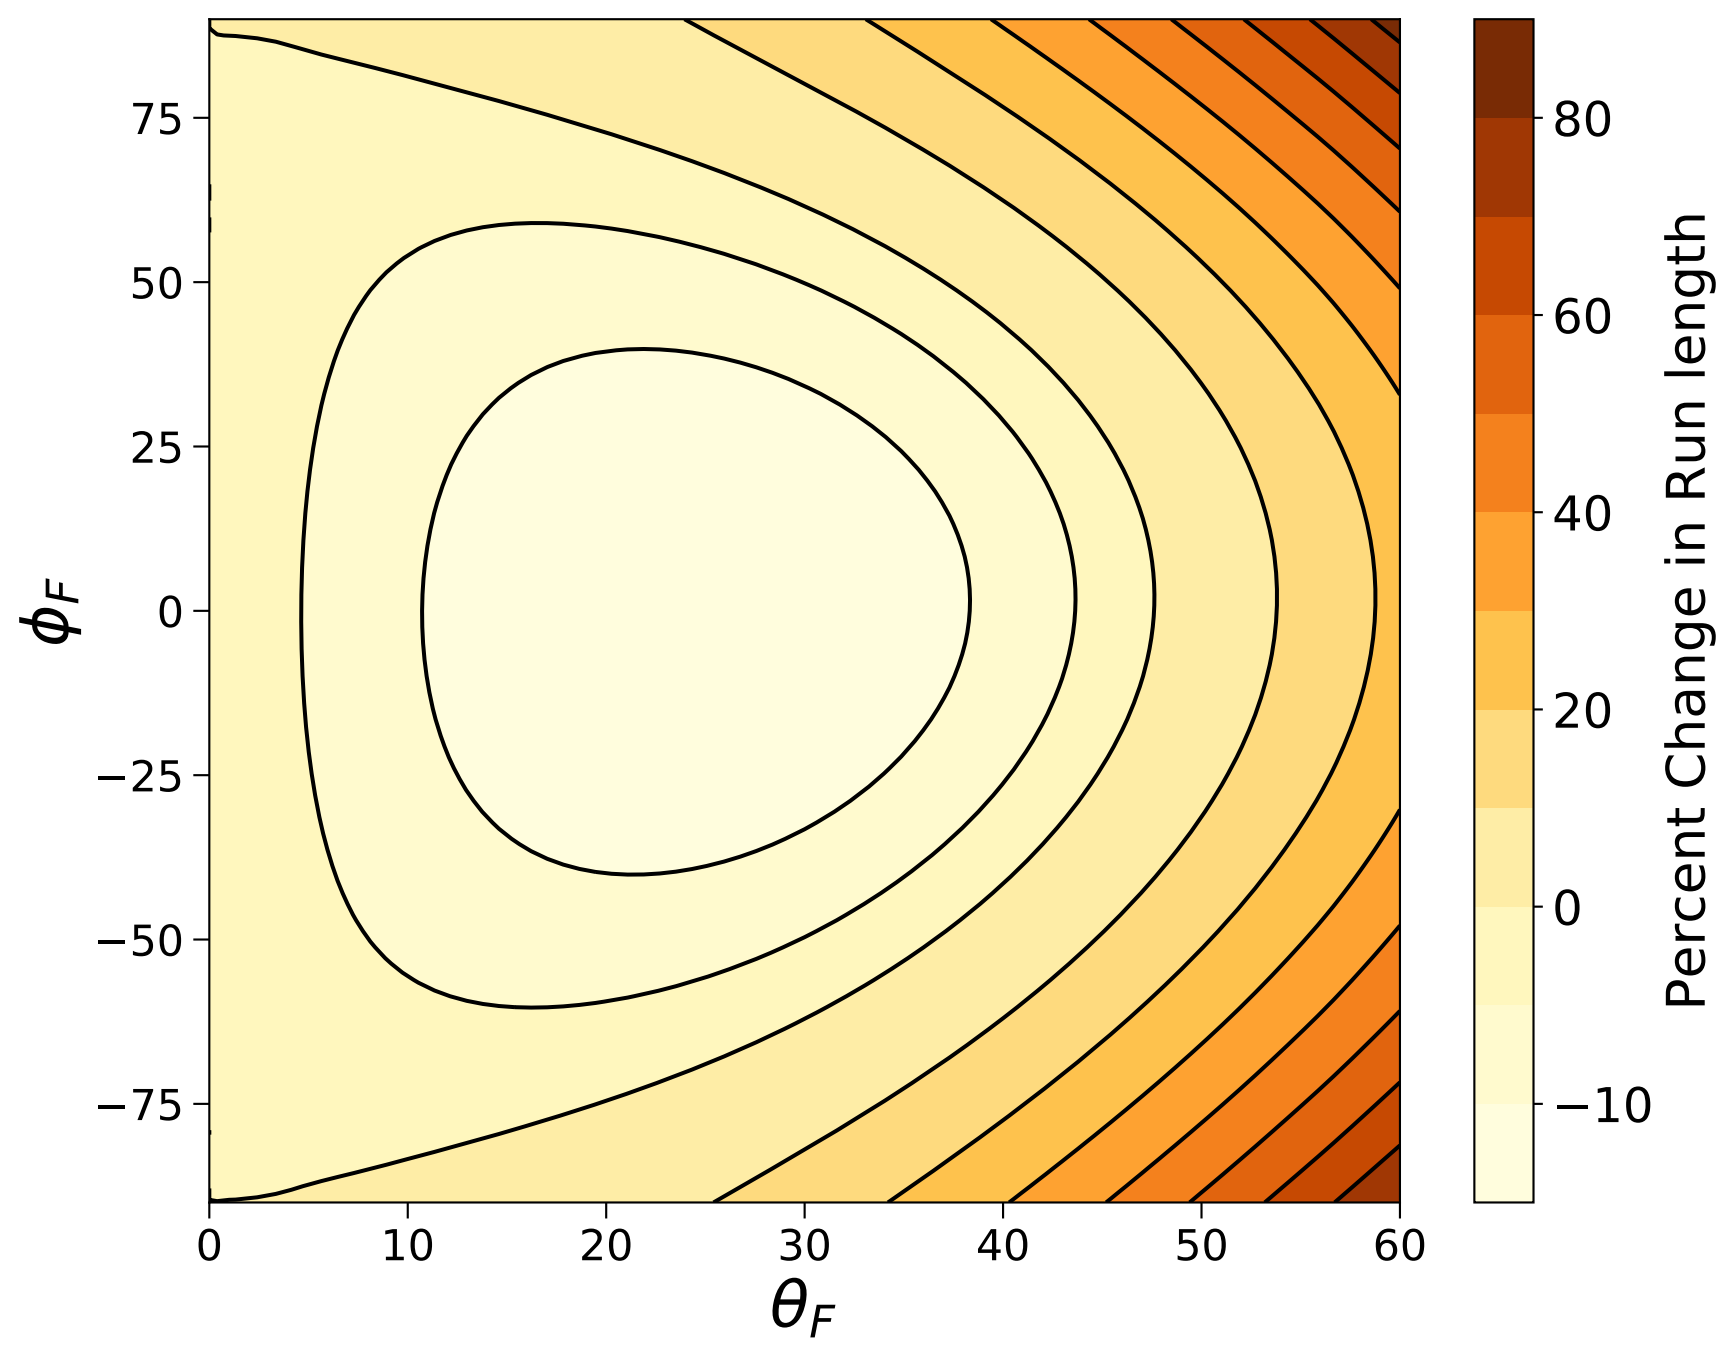

Supplement: supp [file elife-51569-supp-v1.zip]

## Raw step distributions, $\mathcal{P}_{\text{dist}}^n$ :

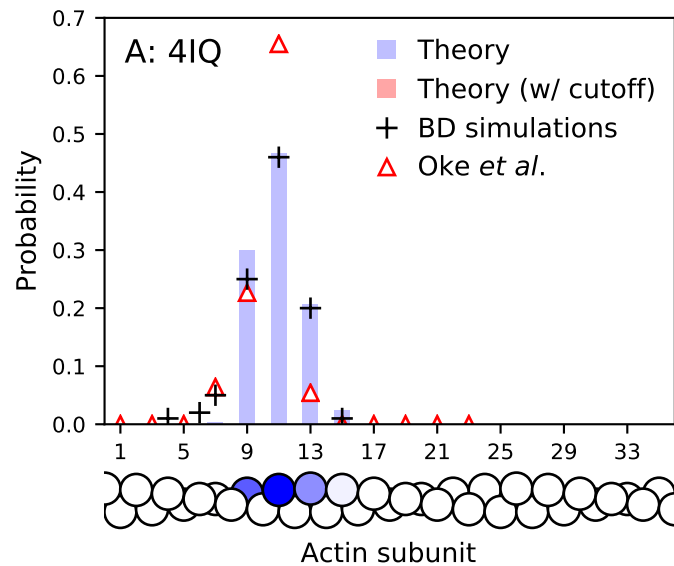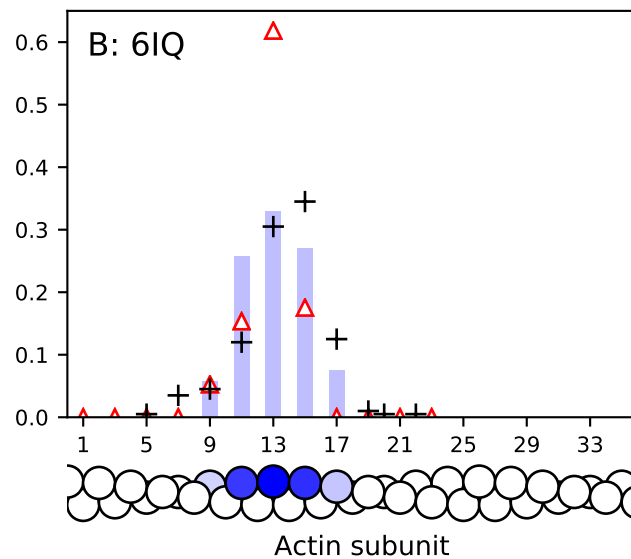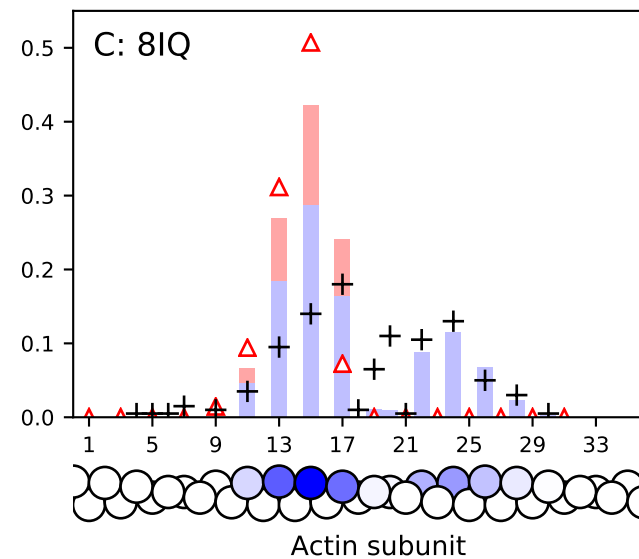

## Full step distributions, $\mathcal{P}_{\text{T}}(z_n)$ :

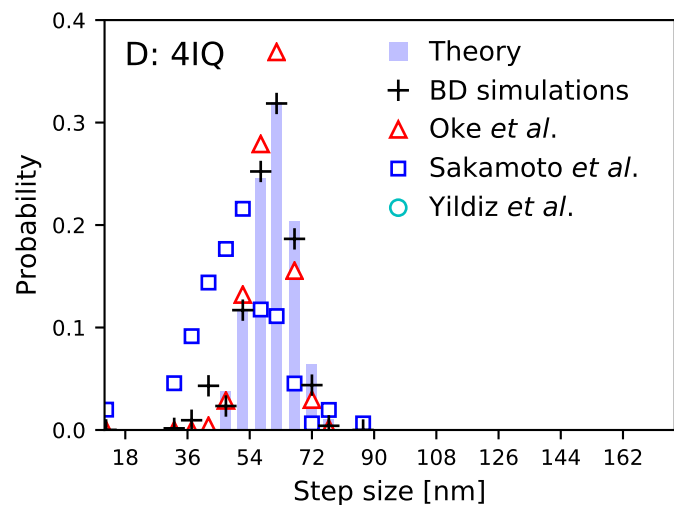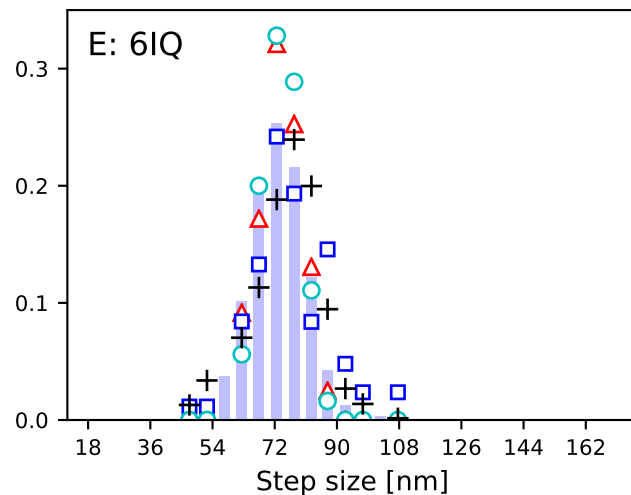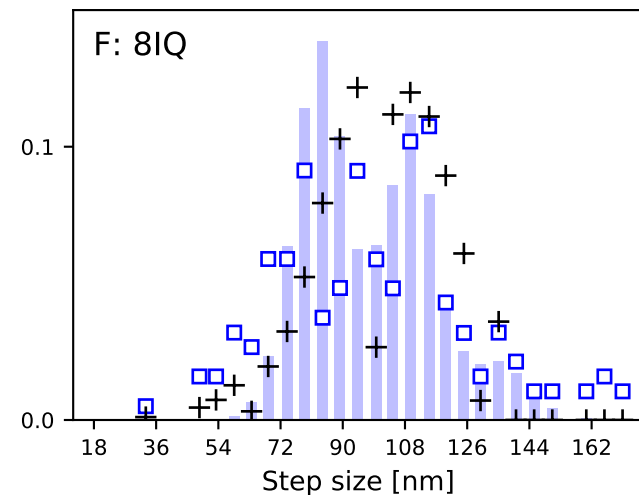

Supplement: supp [file elife-51569-supp-v1.zip]

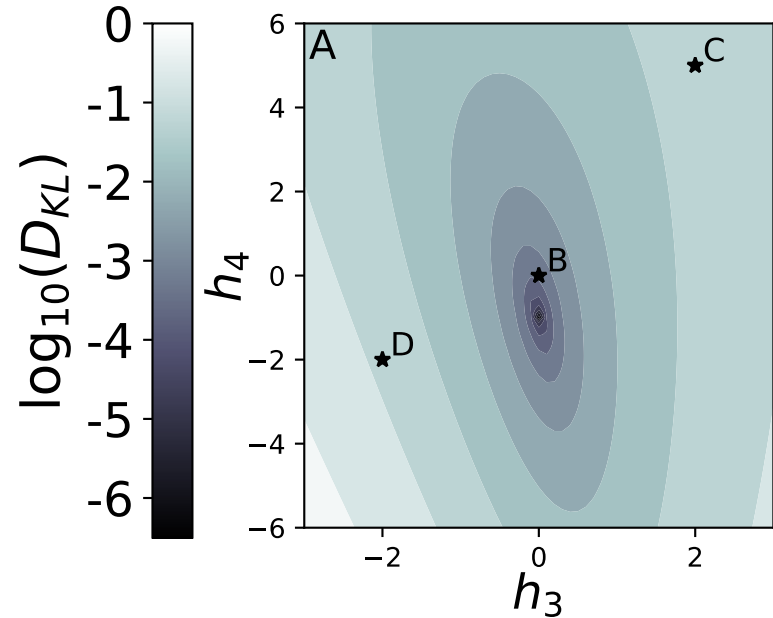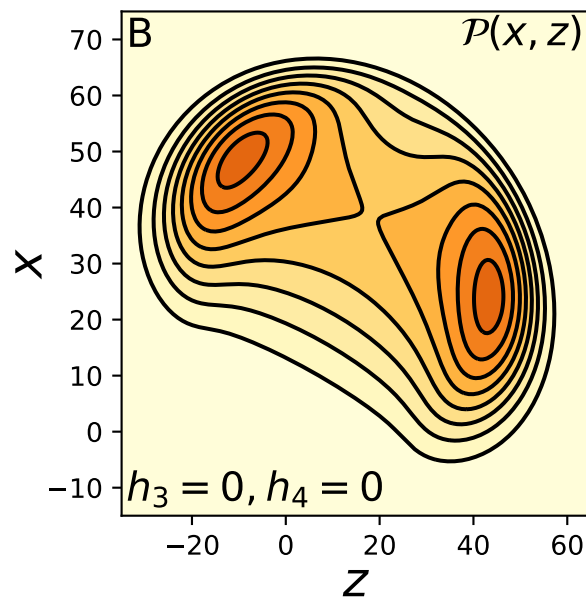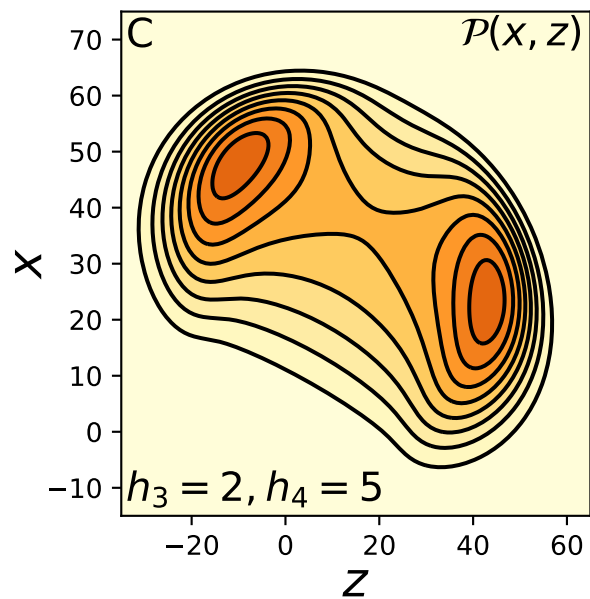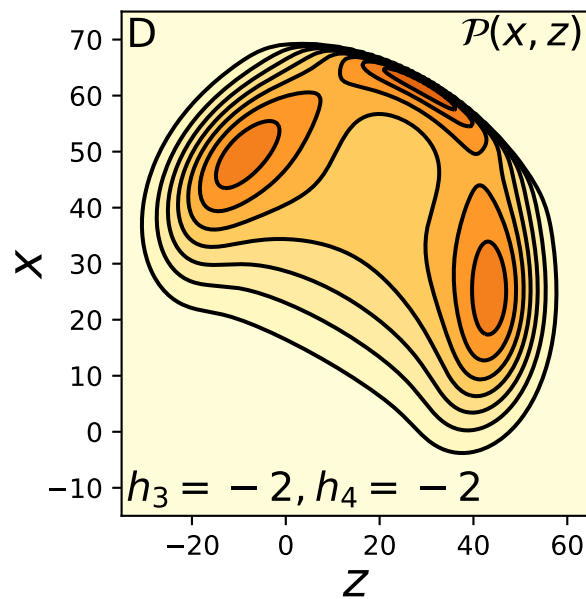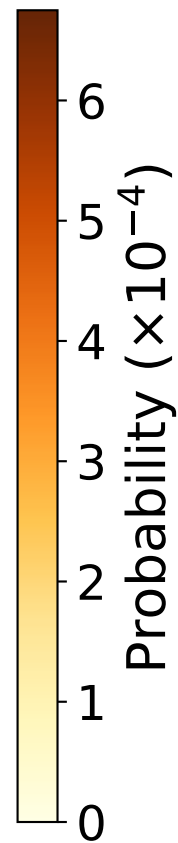

Supplement: supp [file elife-51569-supp-v1.zip]

## Free Diffusion ( $\mu_c = 0$ )

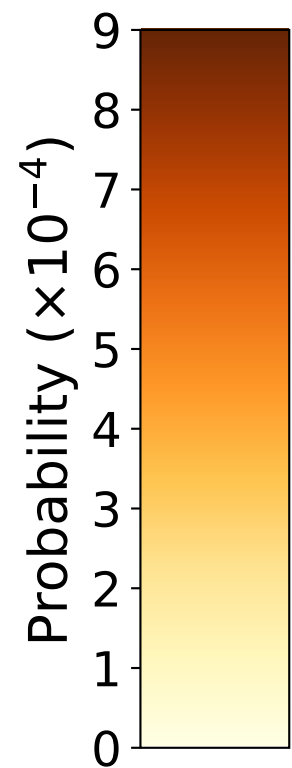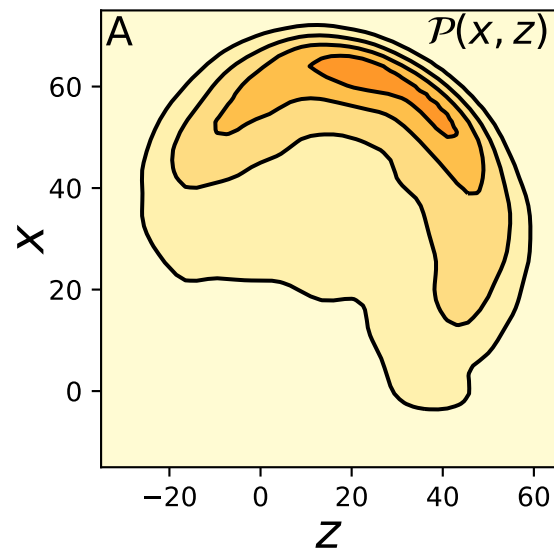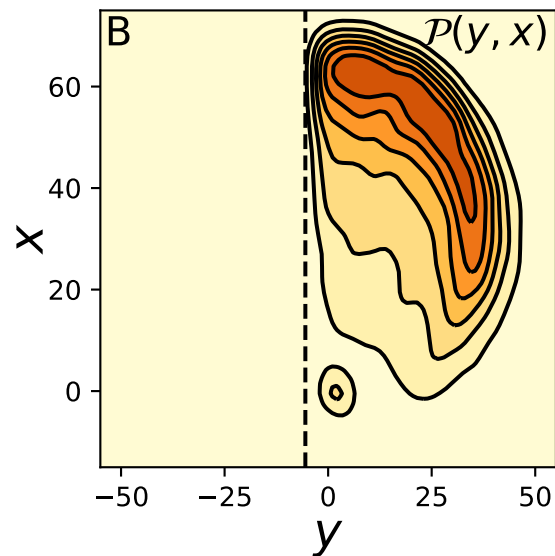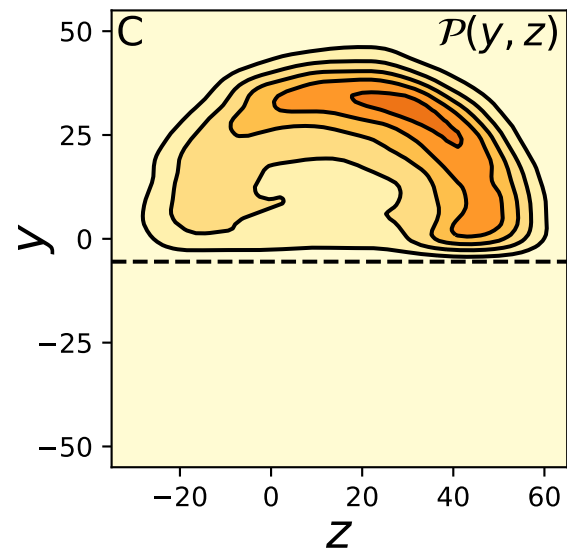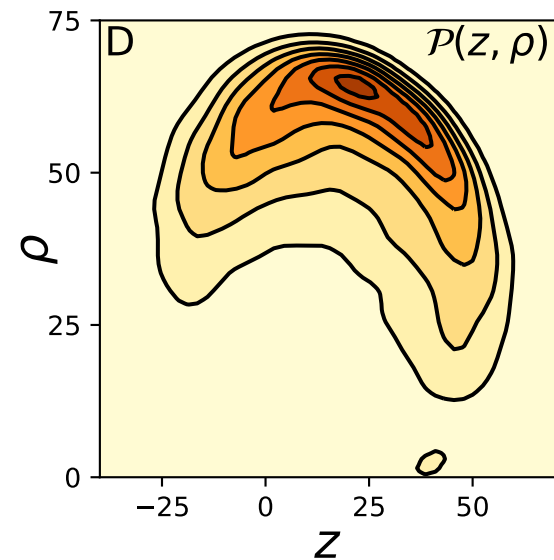

## Constrained Diffusion ( $\mu_c = 5$ )

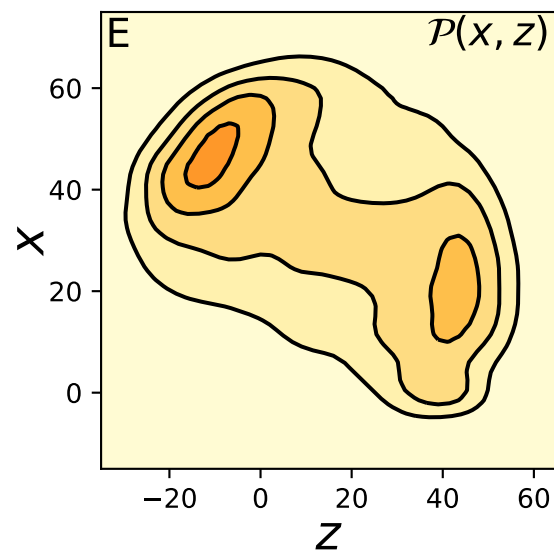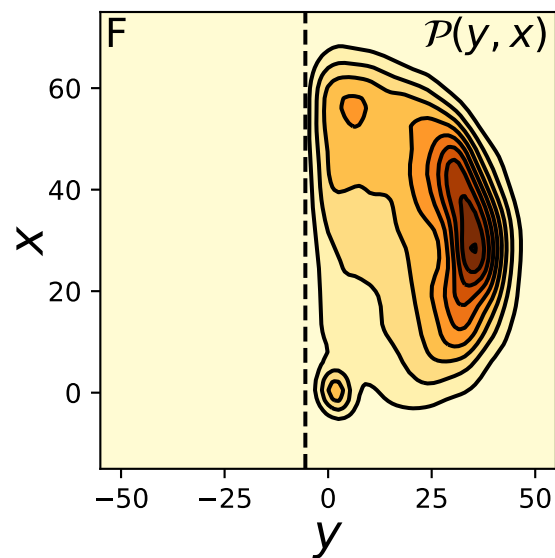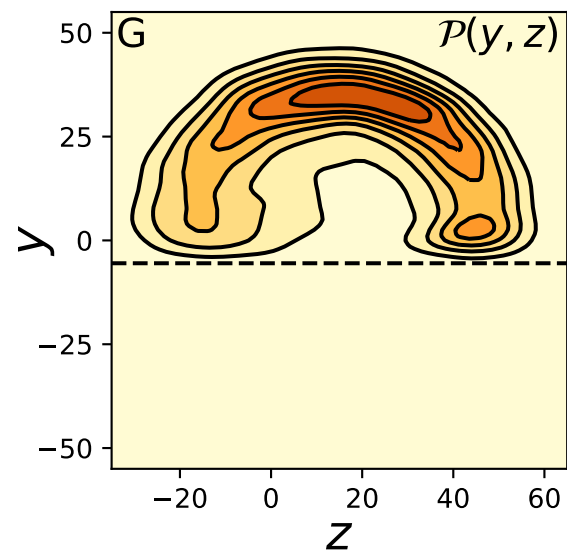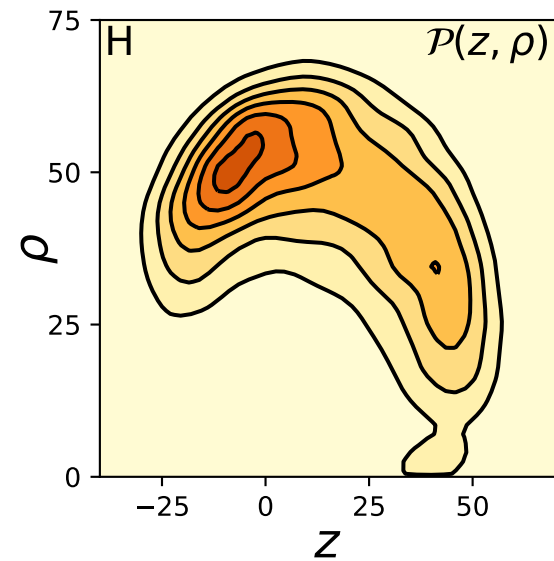

Supplement: supp [file elife-51569-supp-v1.zip]

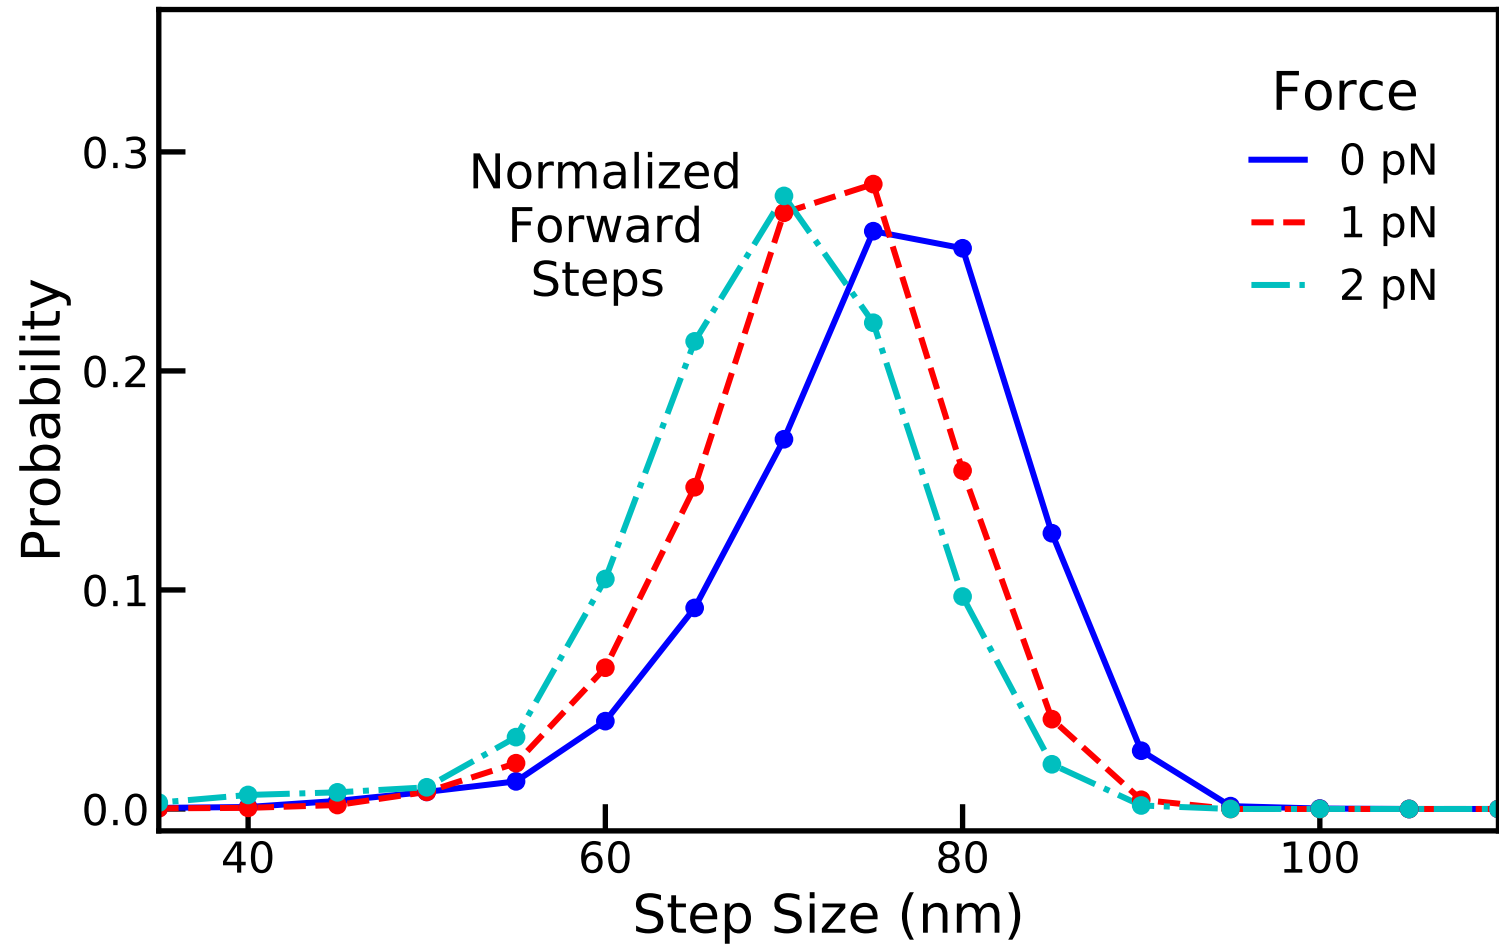

Supplement: supp [file elife-51569-supp-v1.zip]

## Raw step distributions, $\mathcal{P}_{\text{dist}}^n$ :

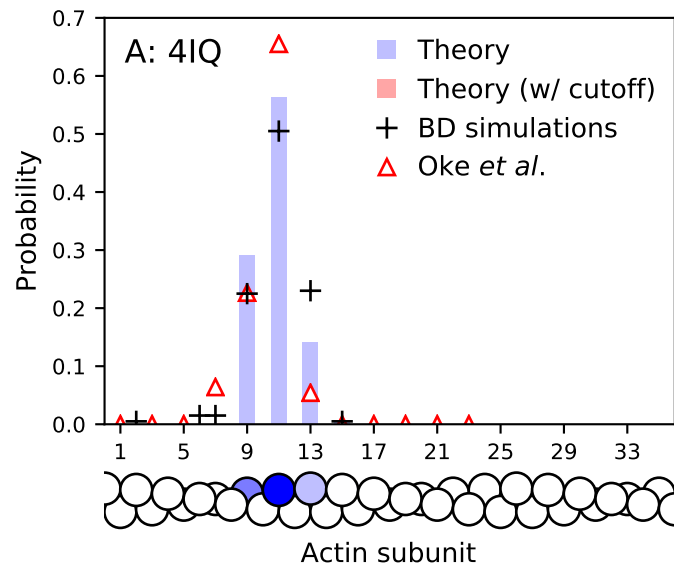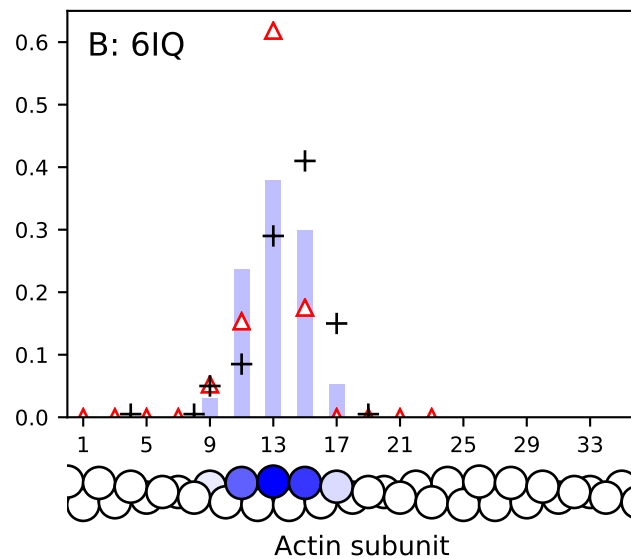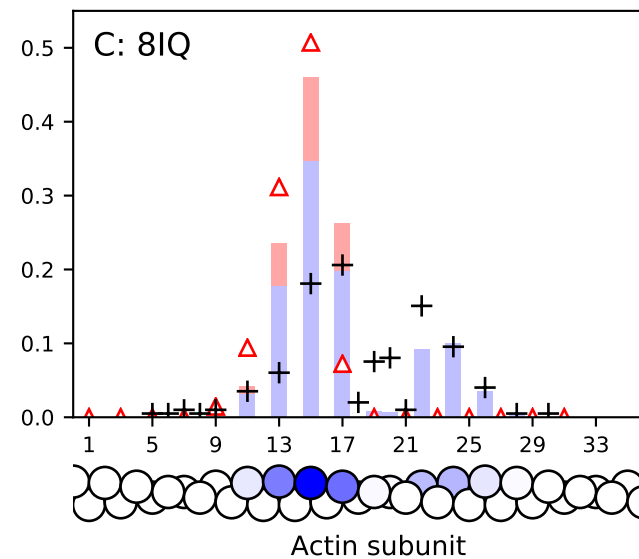

## Full step distributions, $\mathcal{P}_{\text{T}}(z_n)$ :

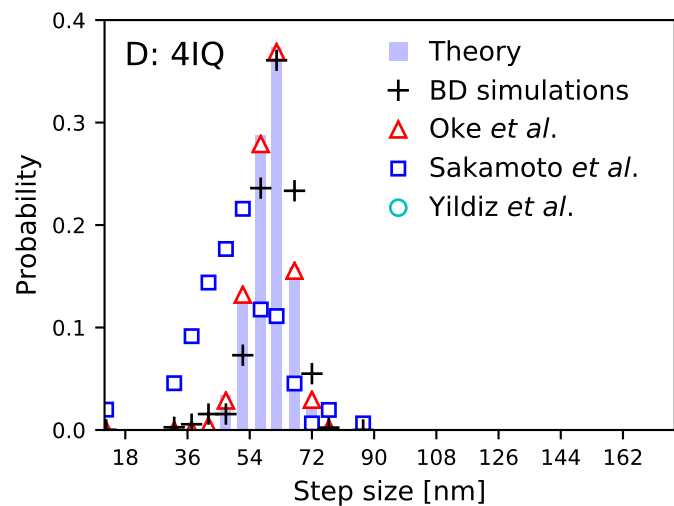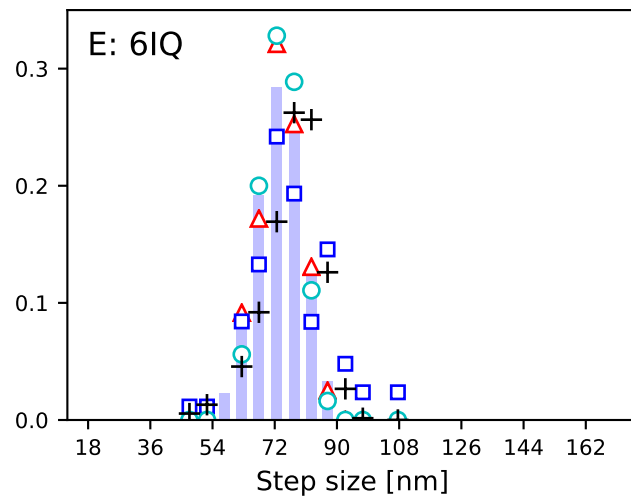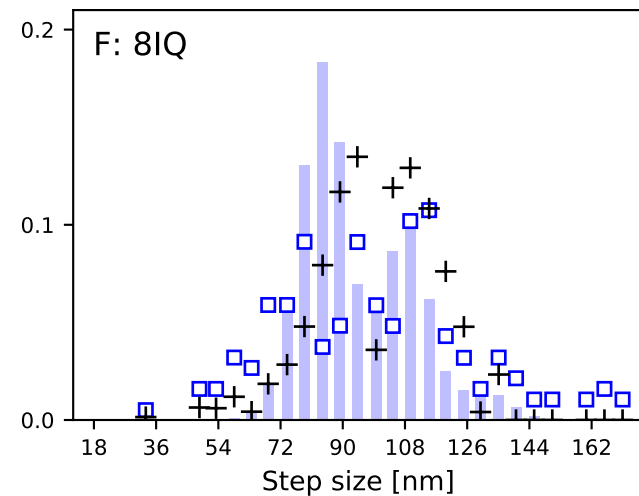

Supplement: supp [file elife-51569-supp-v1.zip]

# Analytical Theory



# Brownian Dynamics Simulations

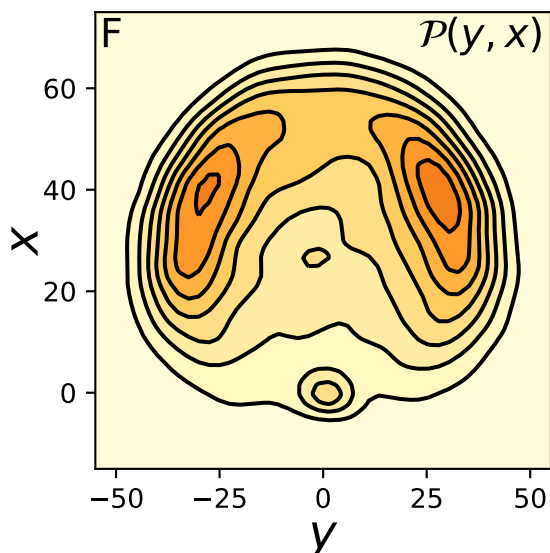

Supplement: supp [file elife-51569-supp-v1.zip]

# Analytical Theory

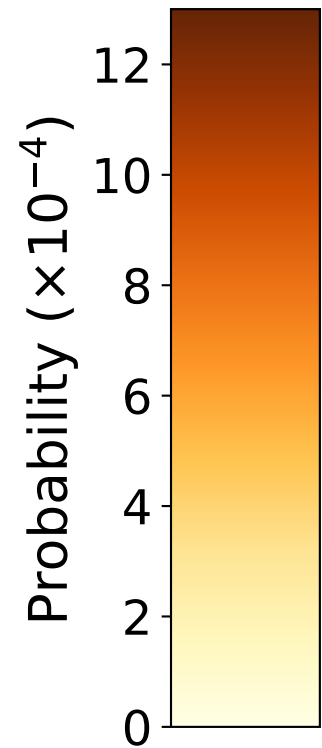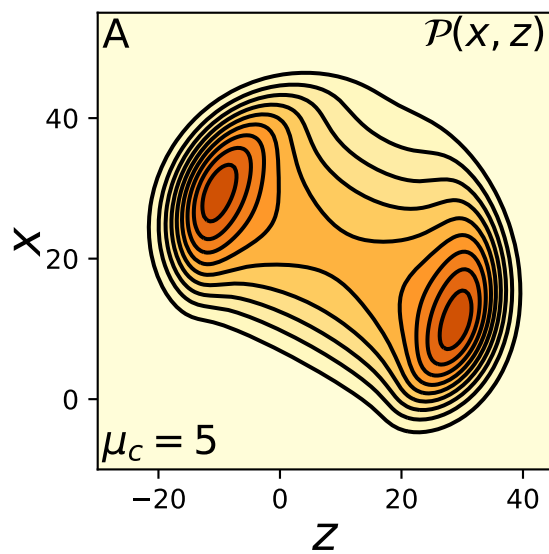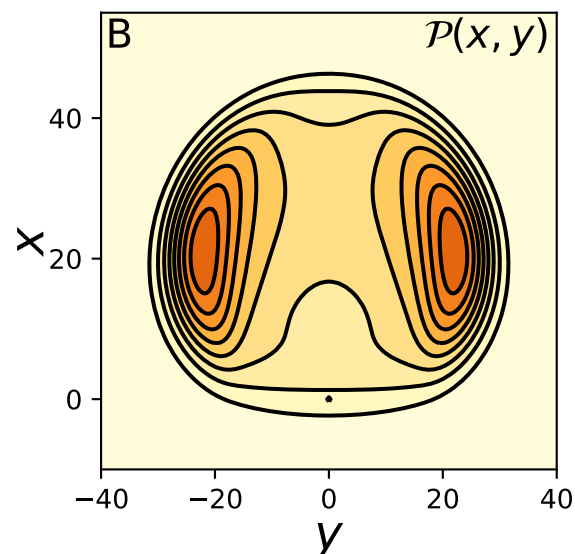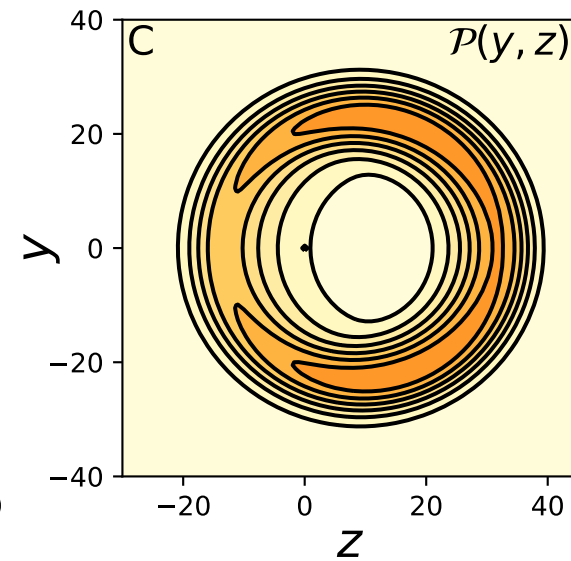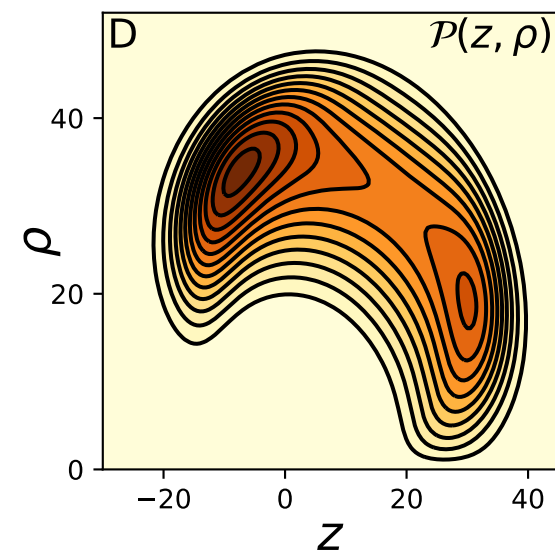

# Brownian Dynamics Simulations

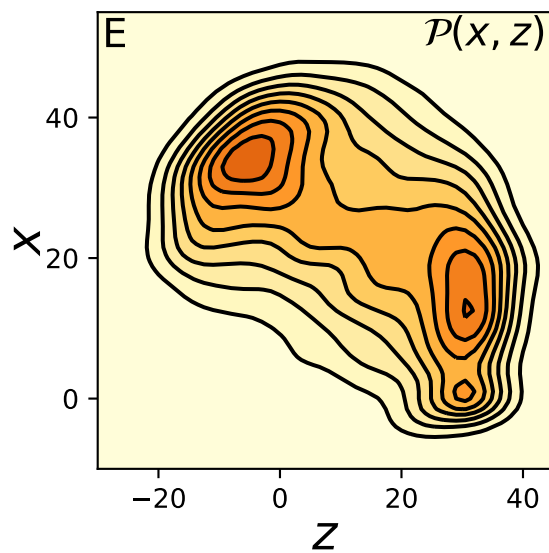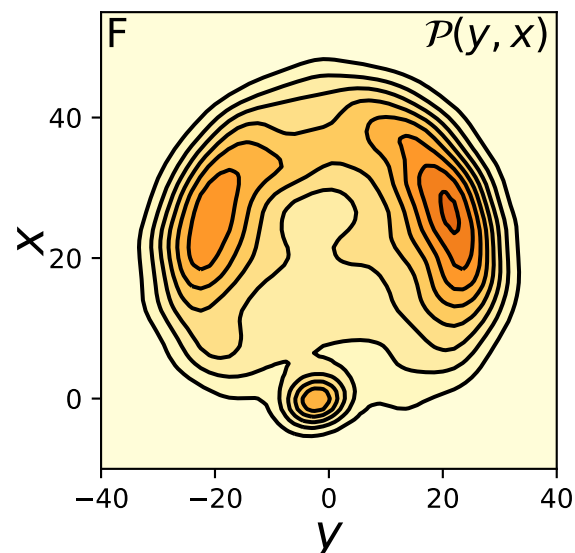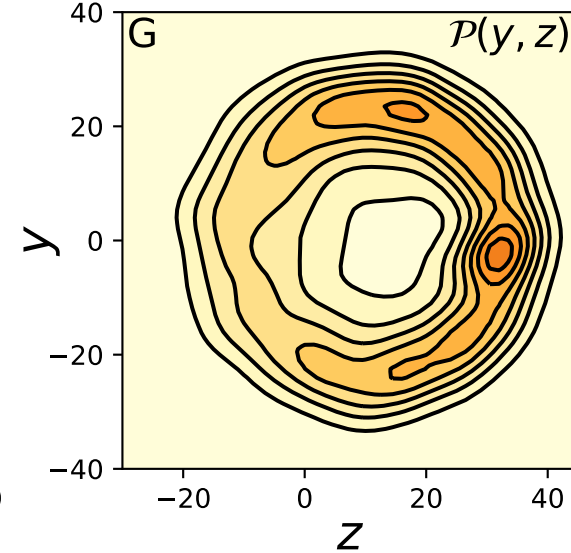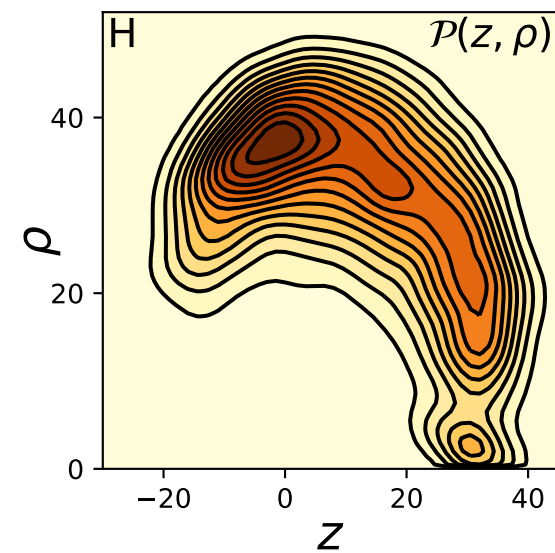

Supplement: supp [file elife-51569-supp-v1.zip]

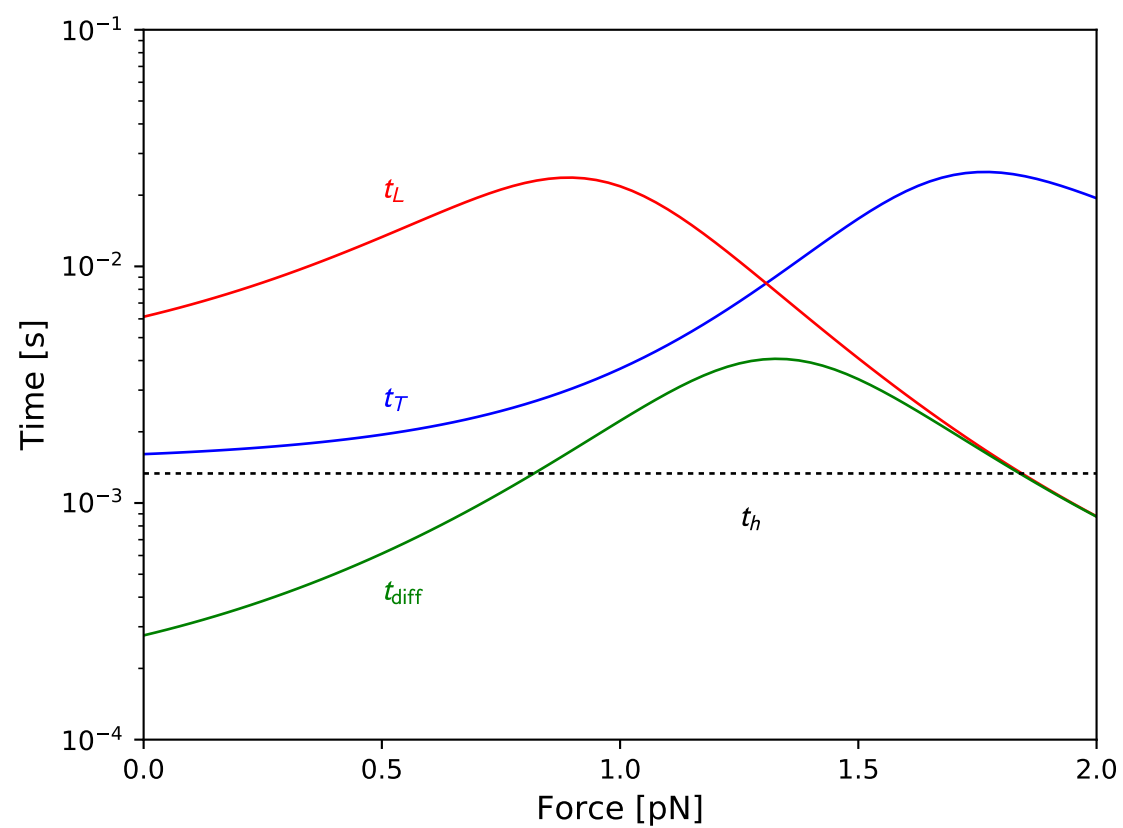

Supplement: supp [file elife-51569-supp-v1.zip]

# Analytical Theory

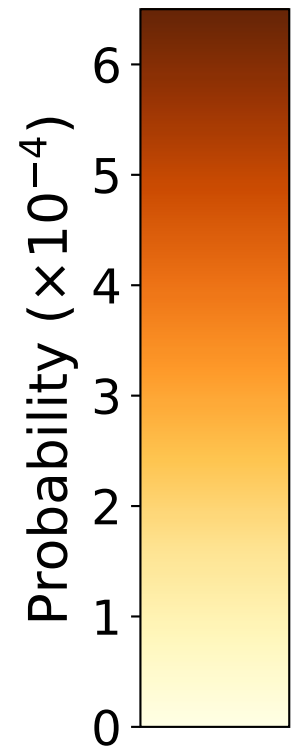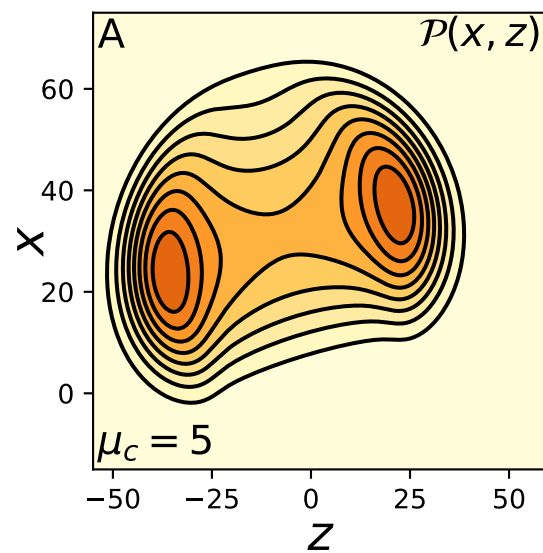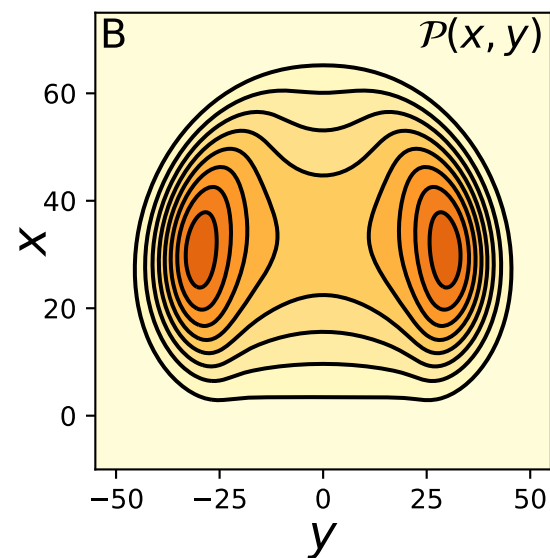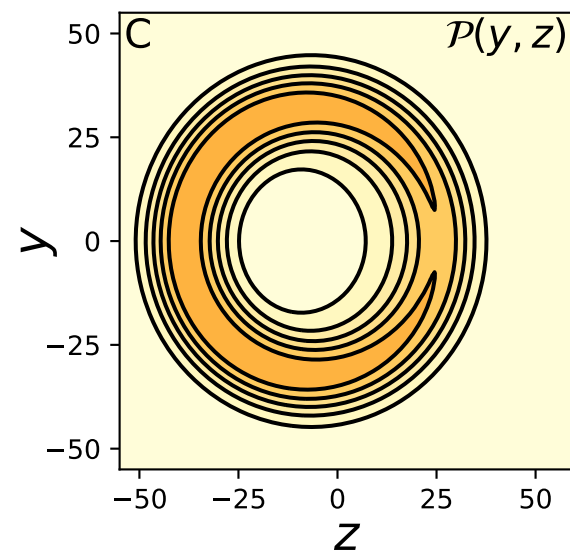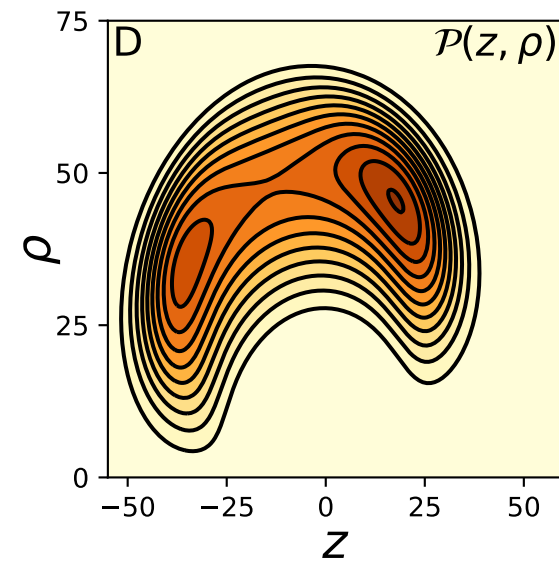

# Brownian Dynamics Simulations

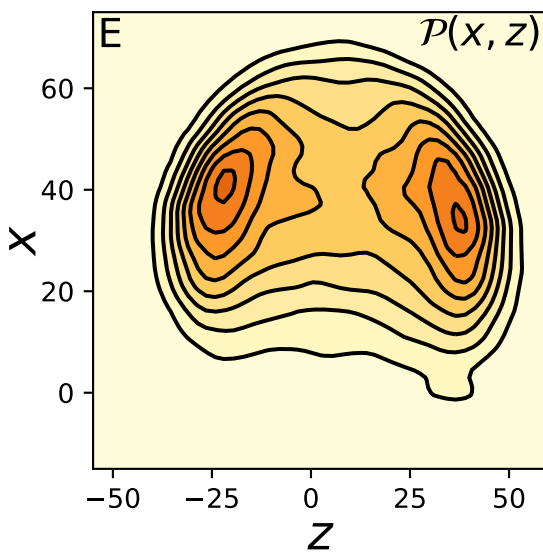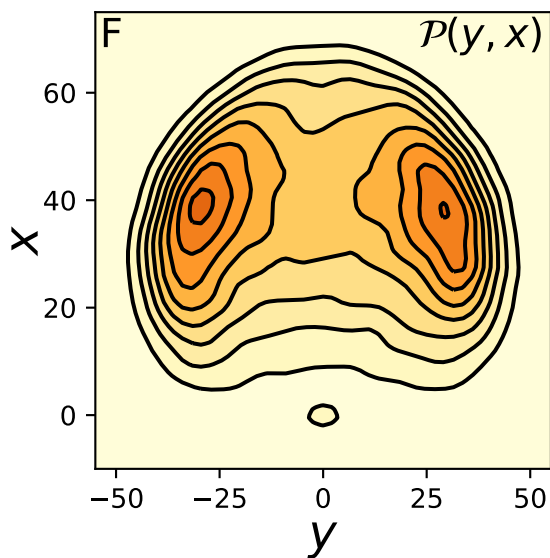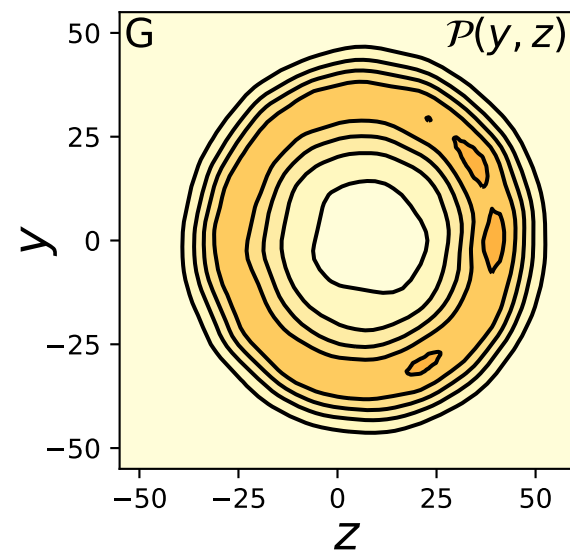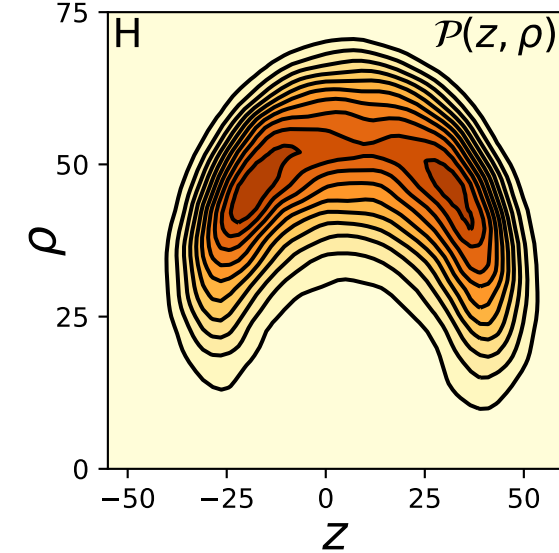

Supplement: supp [file elife-51569-supp-v1.zip]

# Analytical Theory

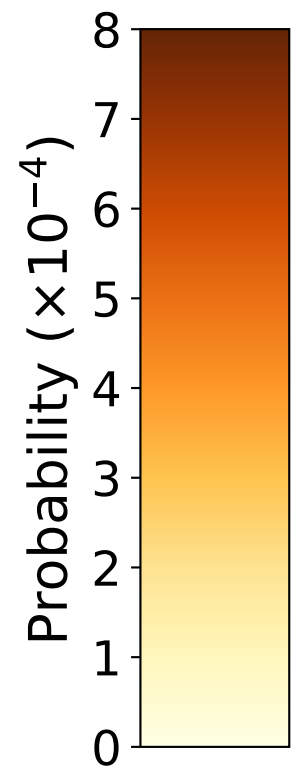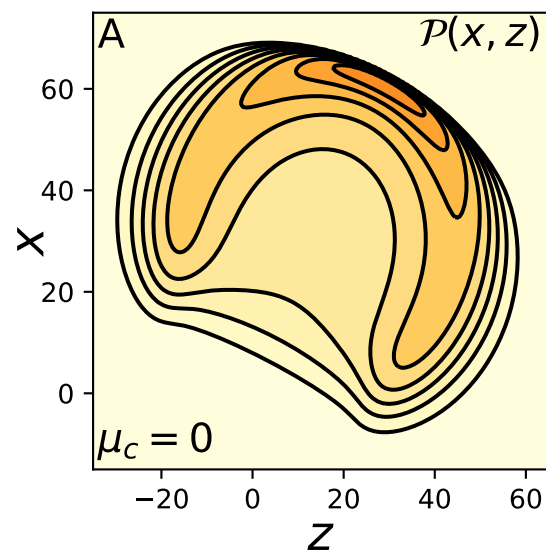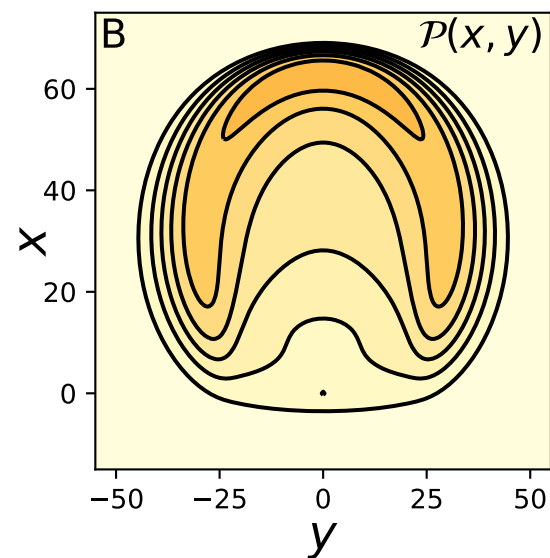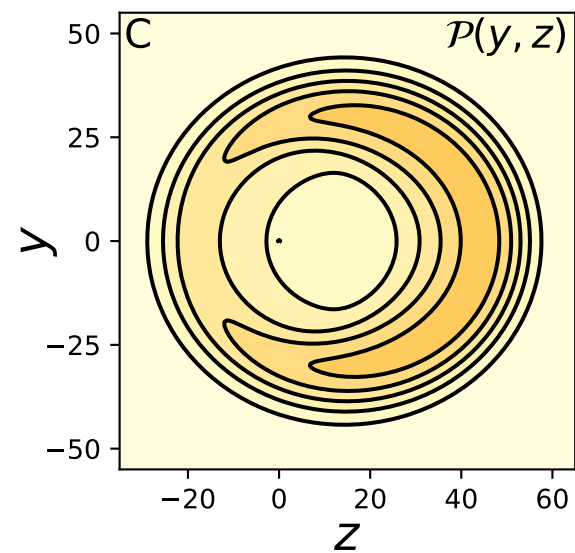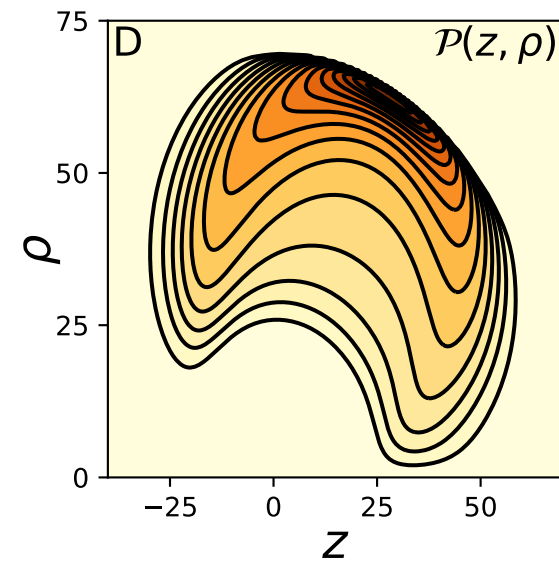

# Brownian Dynamics Simulations

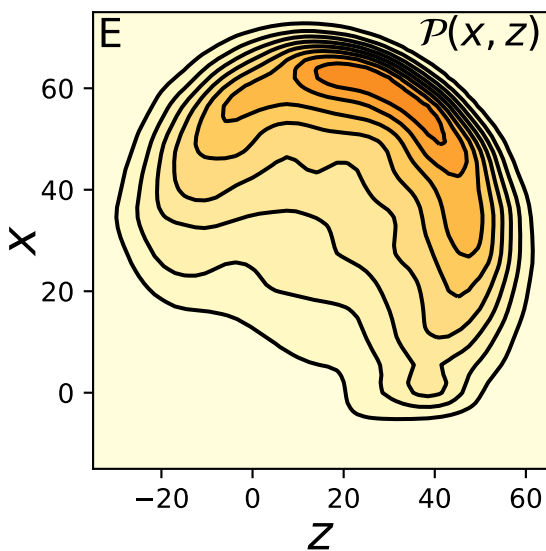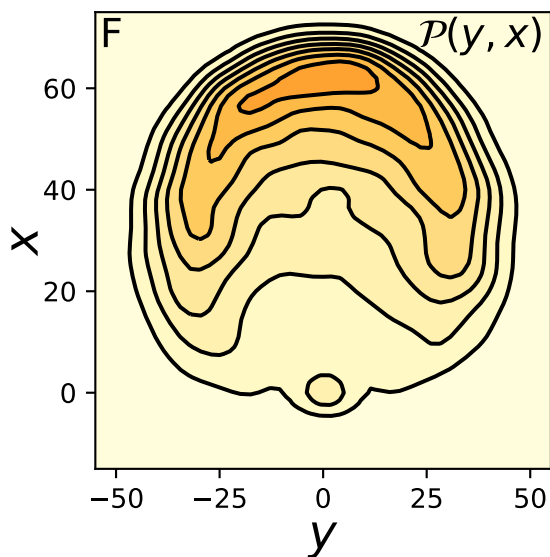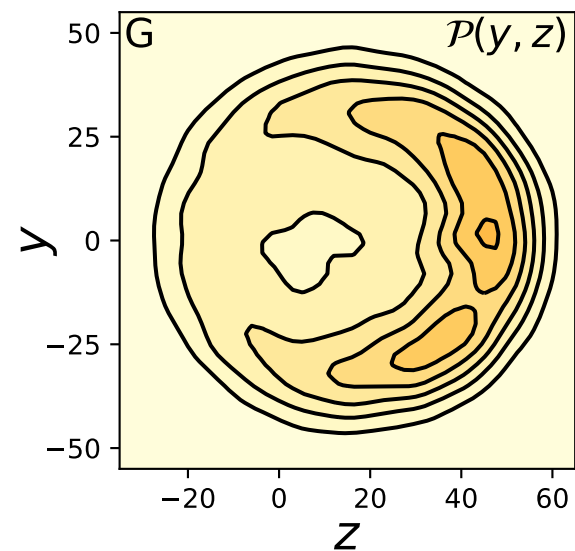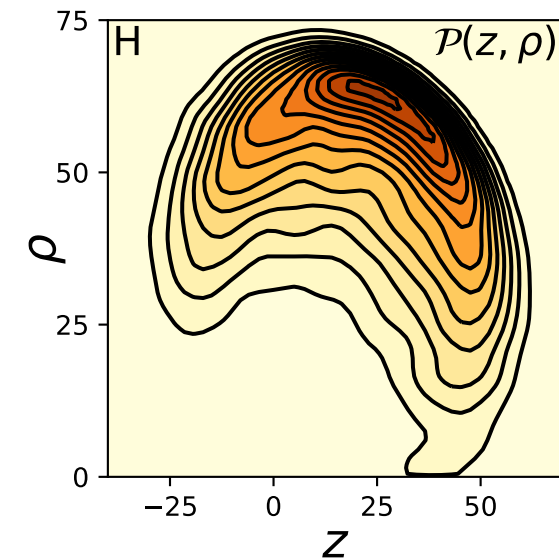

Supplement: supp [file elife-51569-supp-v1.zip]

## Free Diffusion ( $\mu_c = 0$ )

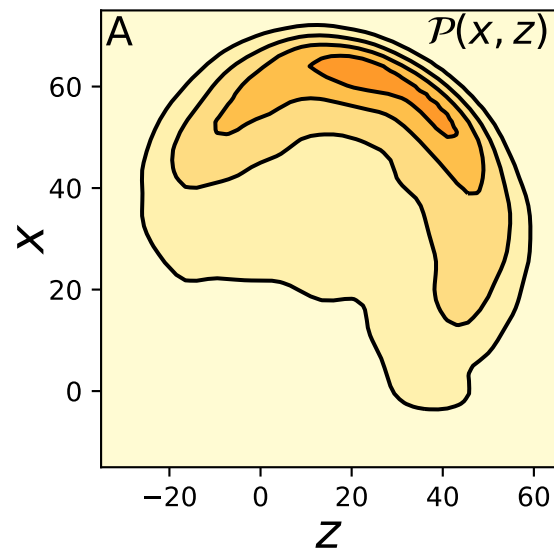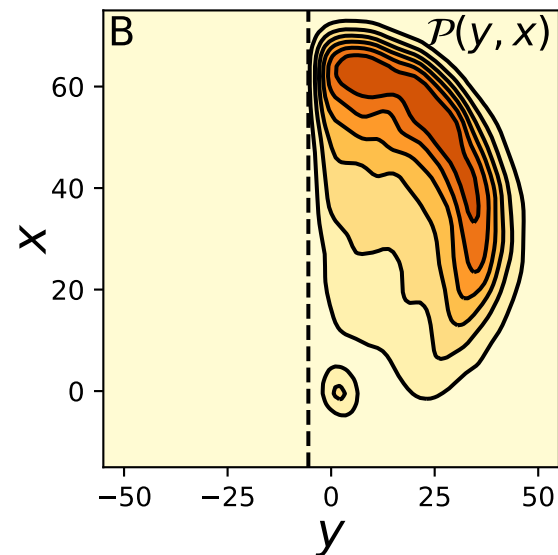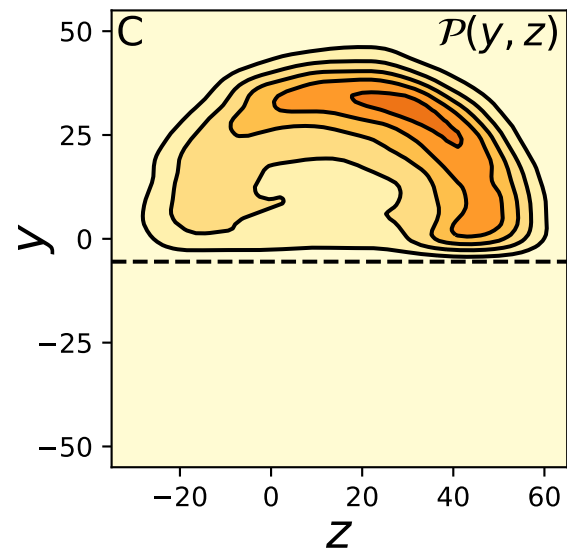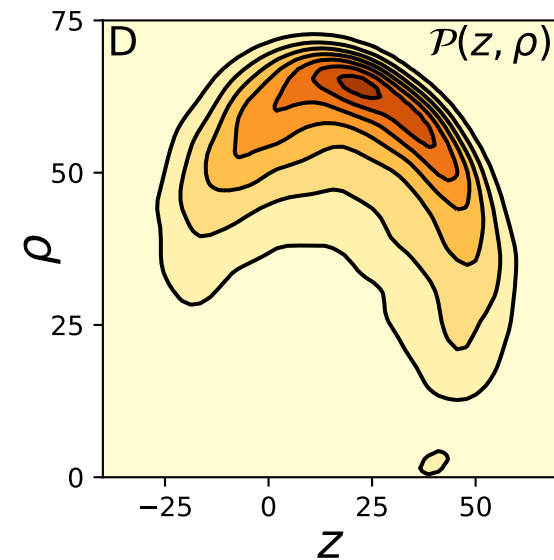

## Constrained Diffusion ( $\mu_c = 5$ )

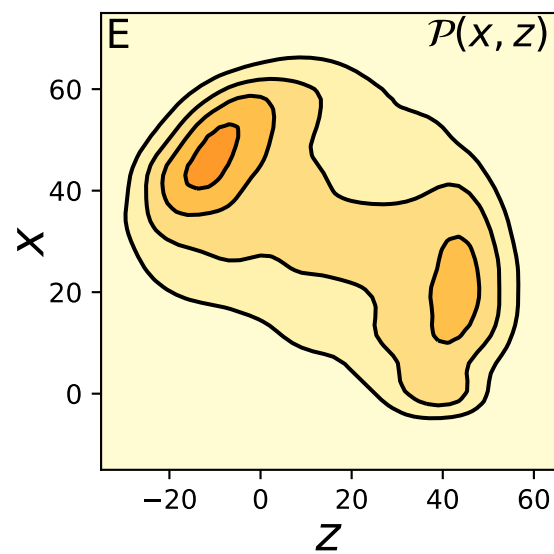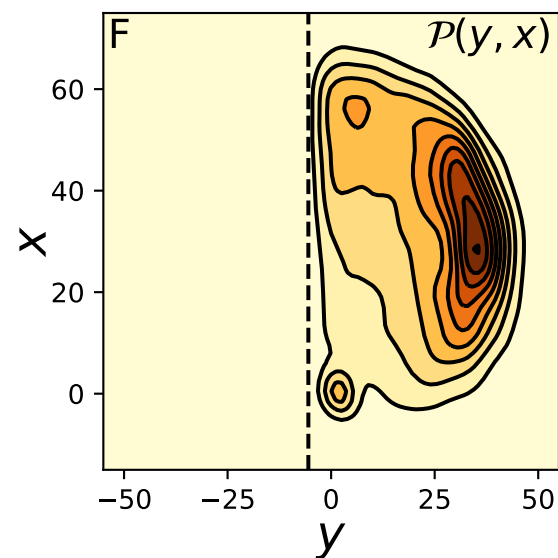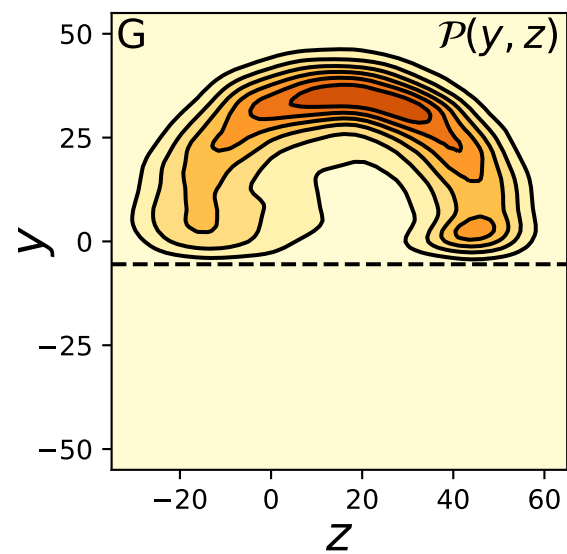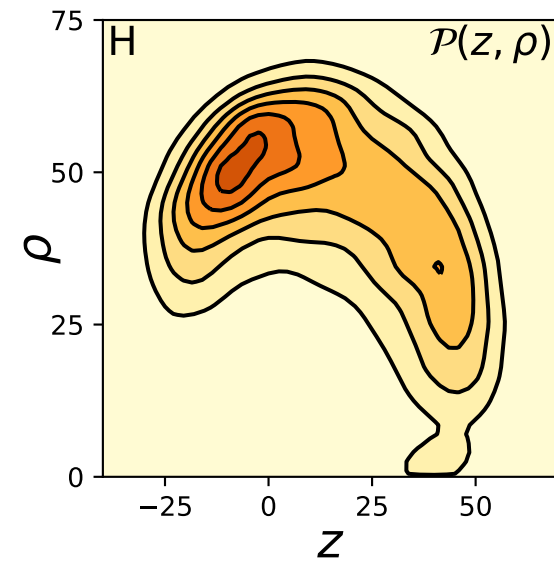

Supplement: supp [file elife-51569-supp-v1.zip]

## Raw step distributions, $\mathcal{P}_{\text{dist}}^n$ :



## Full step distributions, $\mathcal{P}_{\text{T}}(z_n)$ :



Supplement: supp [file elife-51569-supp-v1.zip]

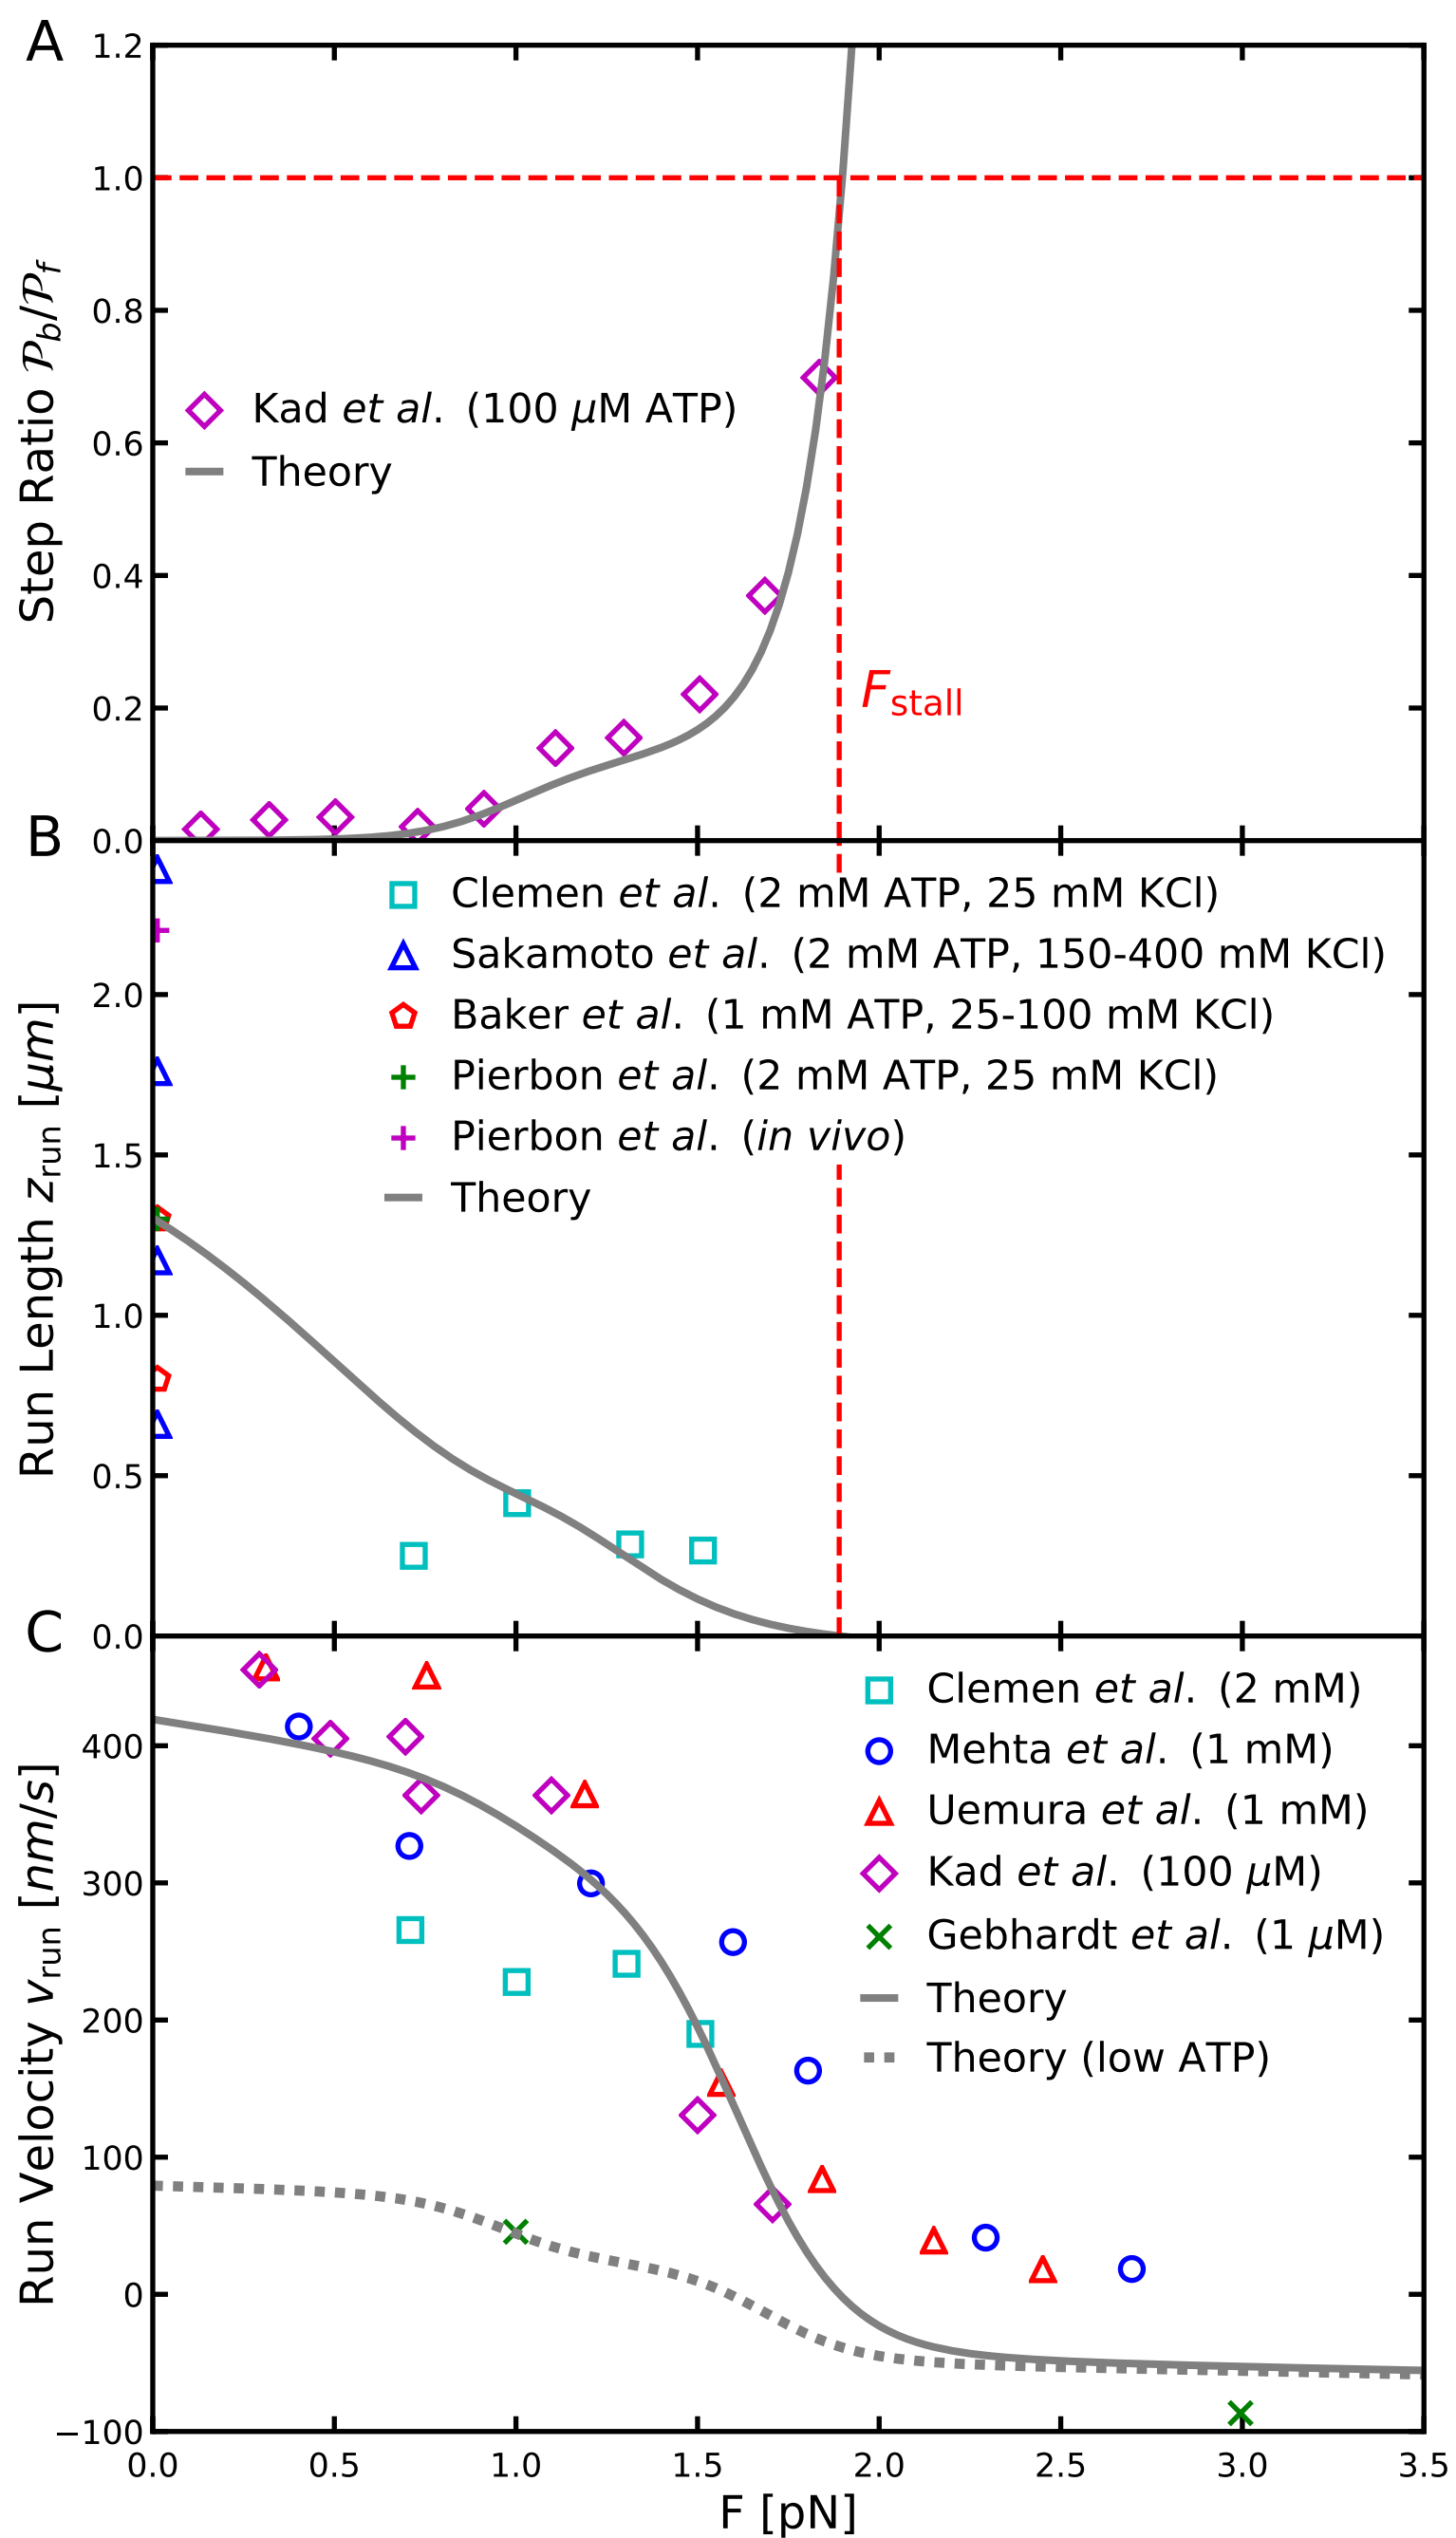

Supplement: supp [file elife-51569-supp-v1.zip]

# Analytical Theory

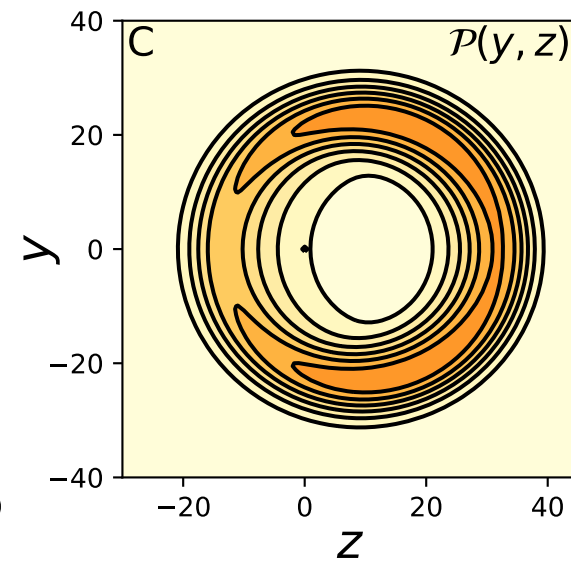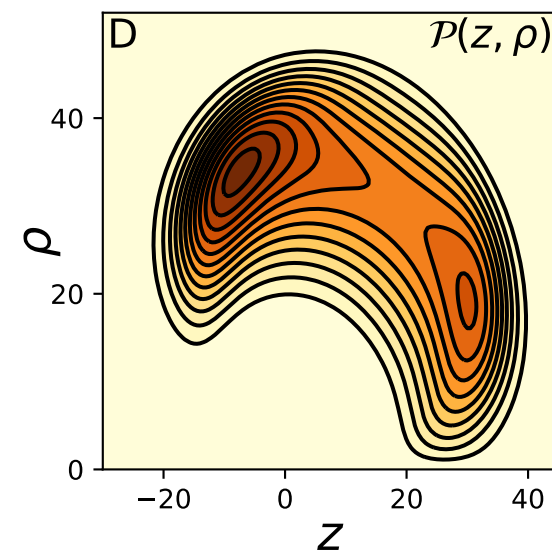

# Brownian Dynamics Simulations

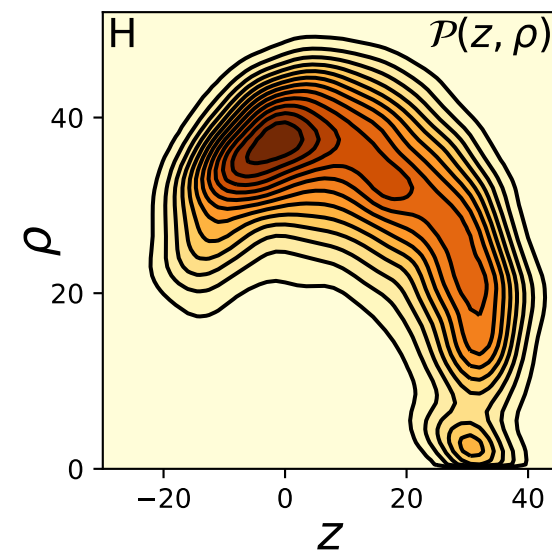

Supplement: supp [file elife-51569-supp-v1.zip]



Supplement: supp [file elife-51569-supp-v1.zip]

# Analytical Theory

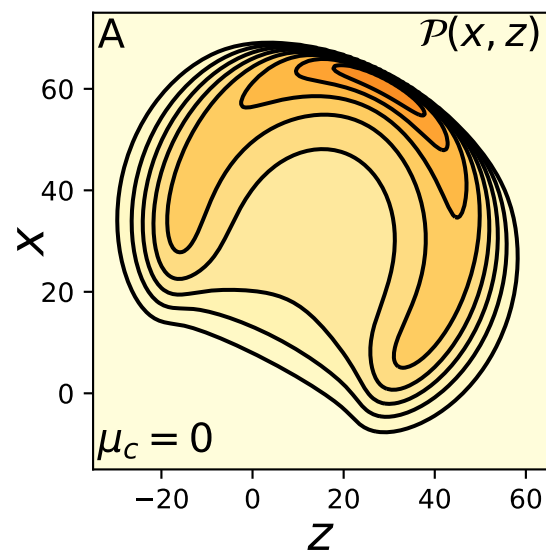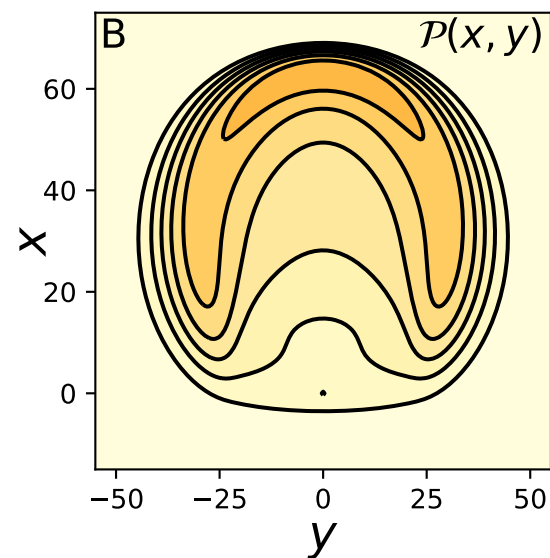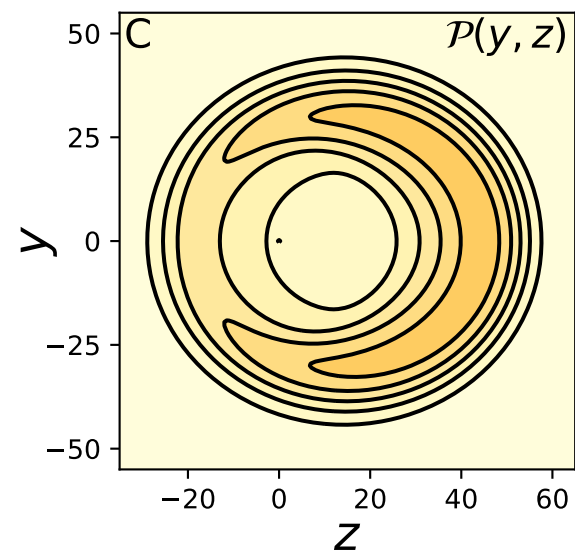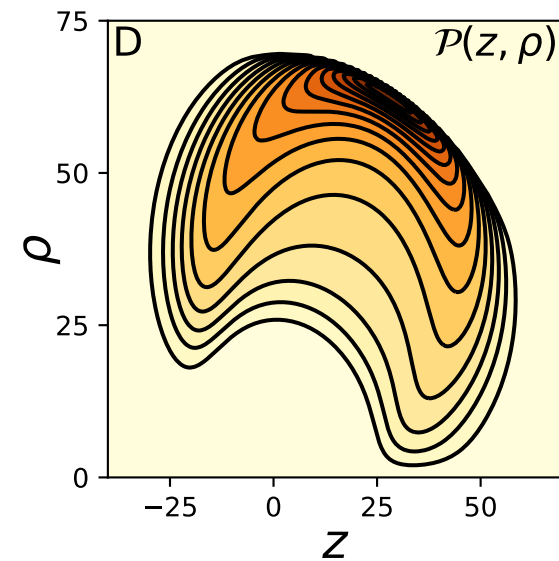

# Brownian Dynamics Simulations

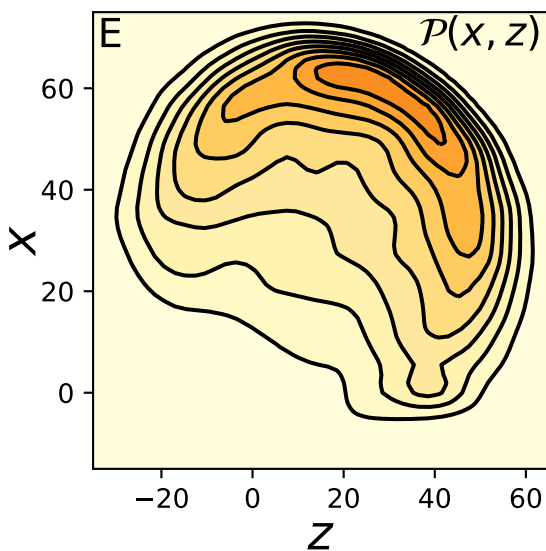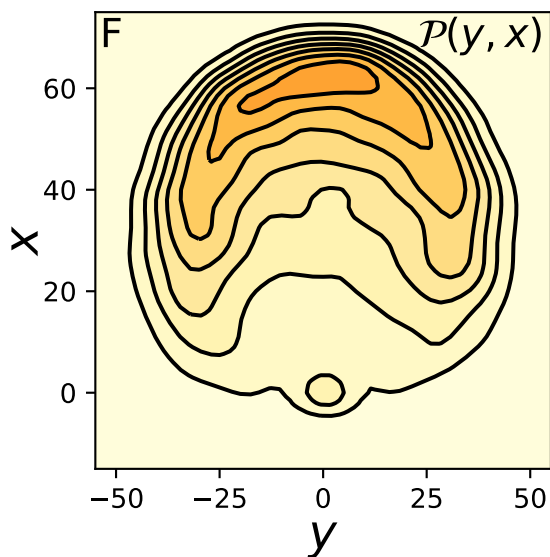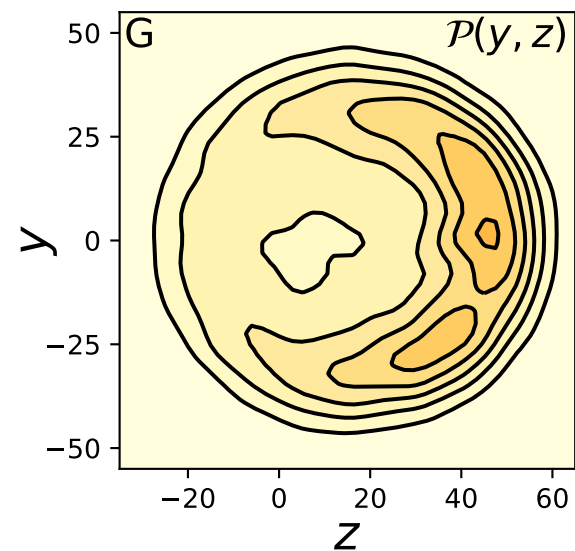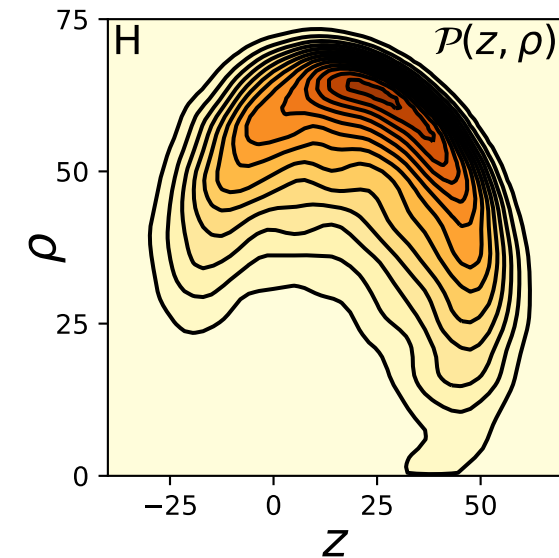

Supplement: supp [file elife-51569-supp-v1.zip]

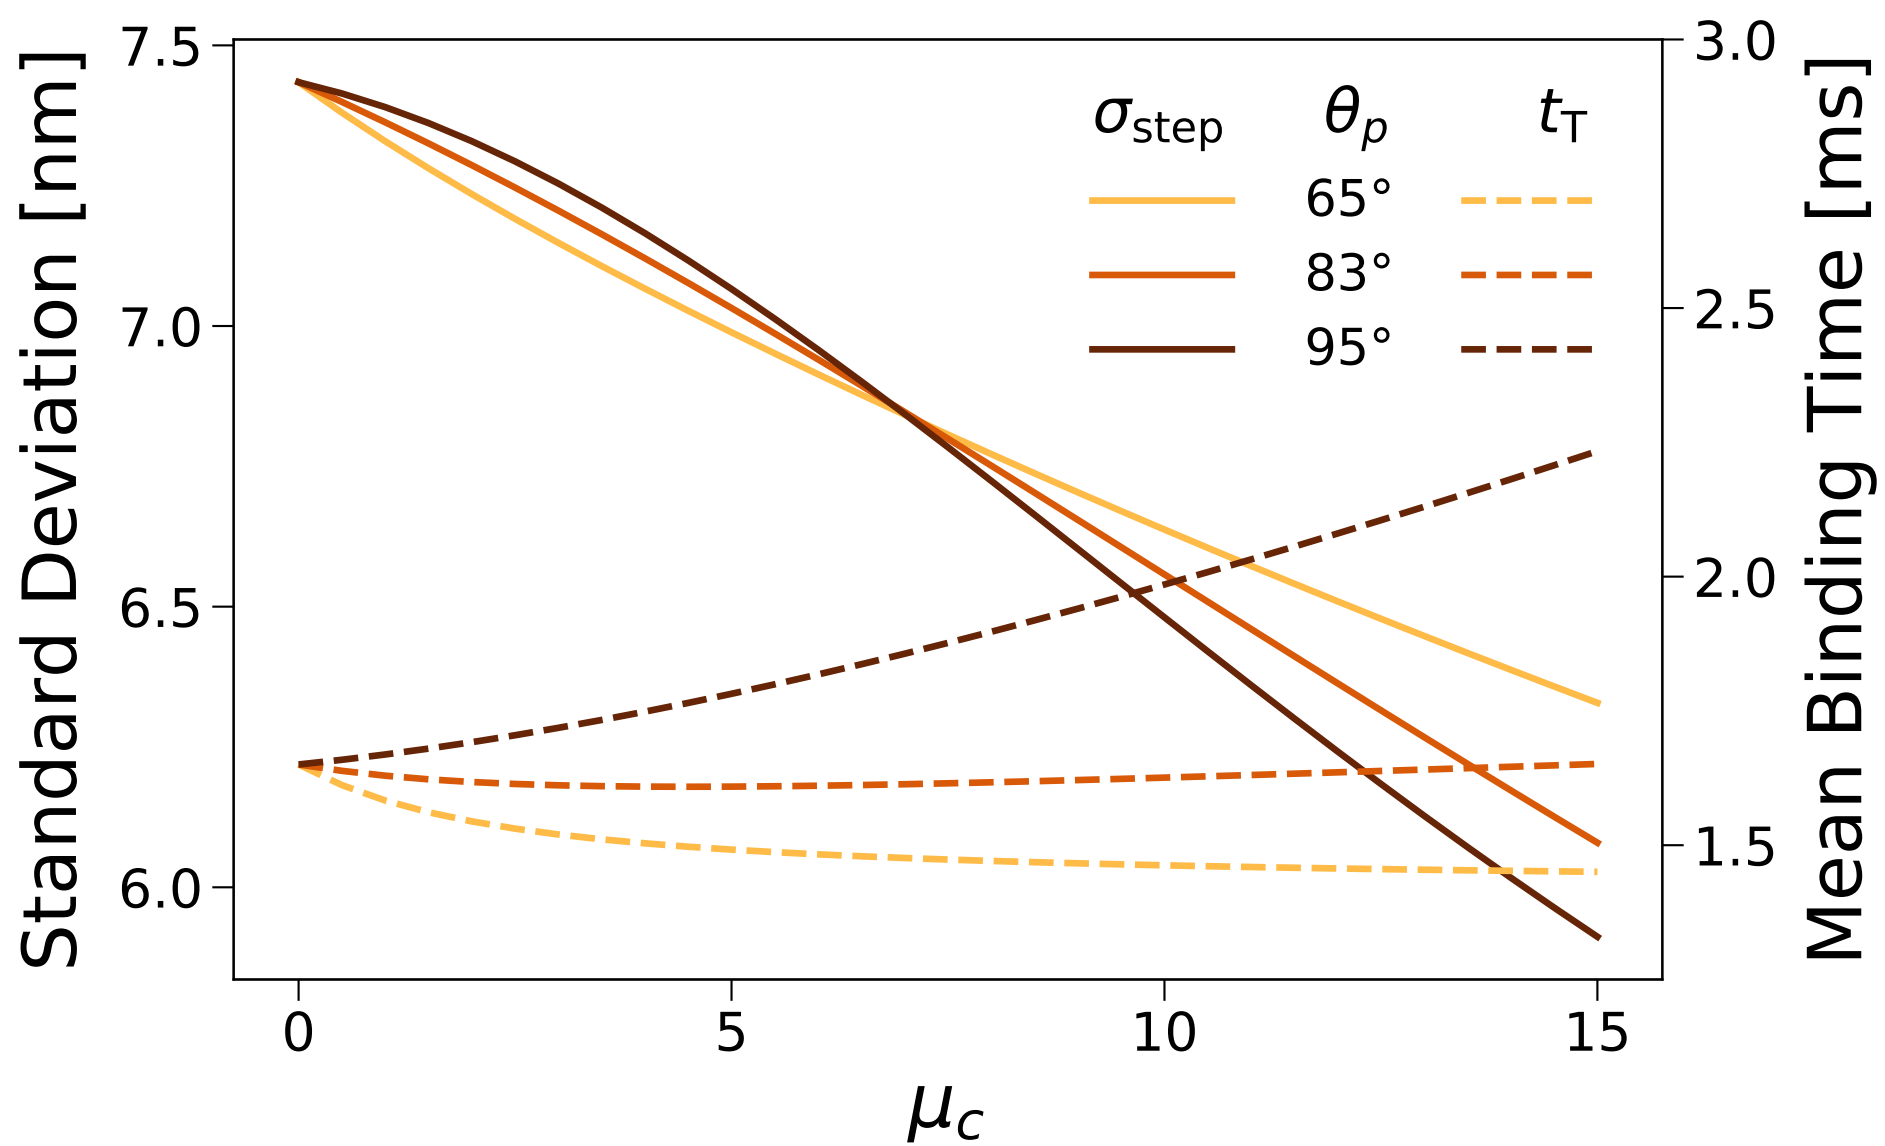

Supplement: supp [file elife-51569-supp-v1.zip]

# Analytical Theory

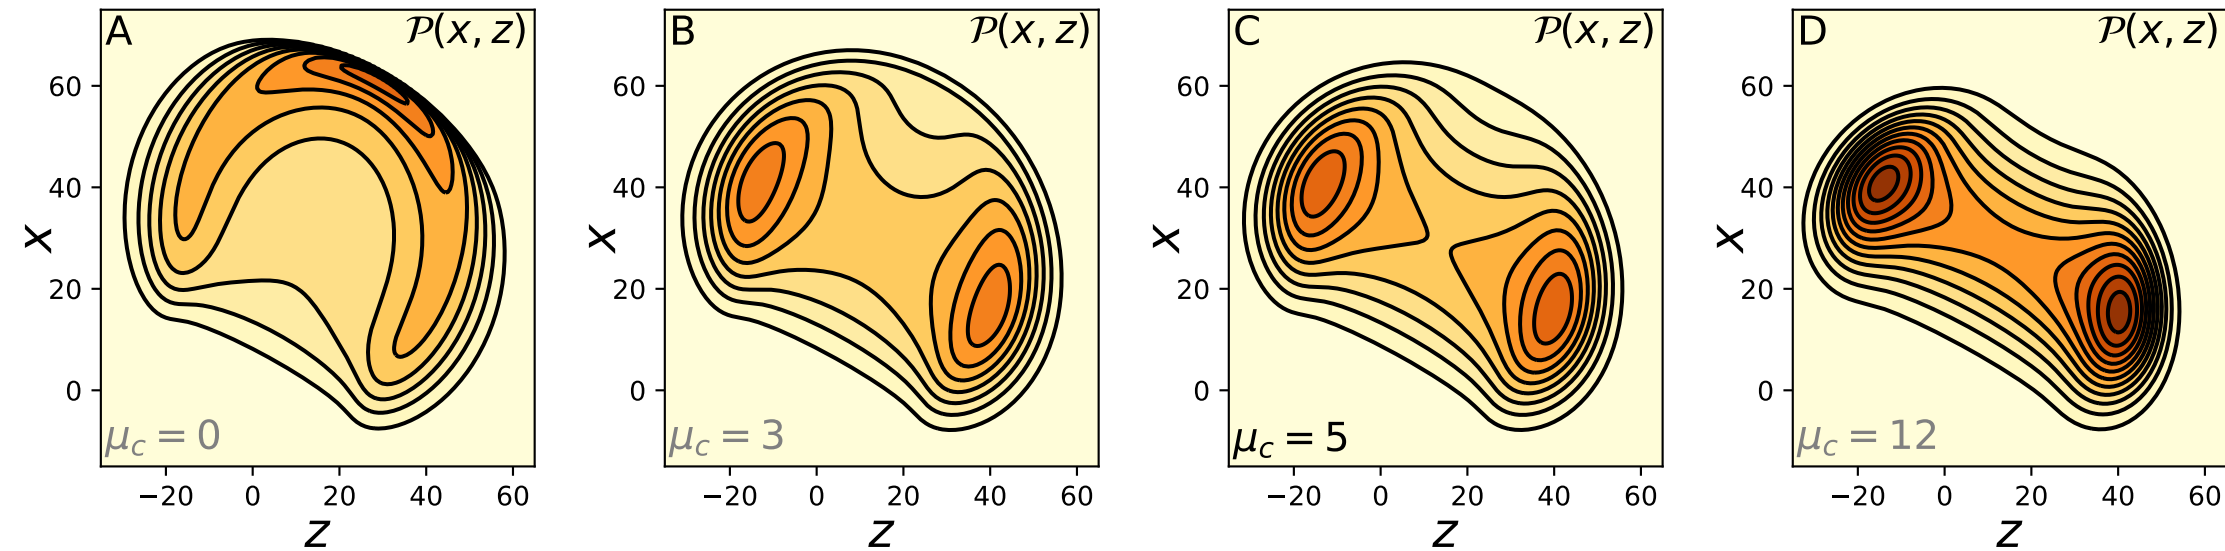

# Brownian Dynamics Simulations

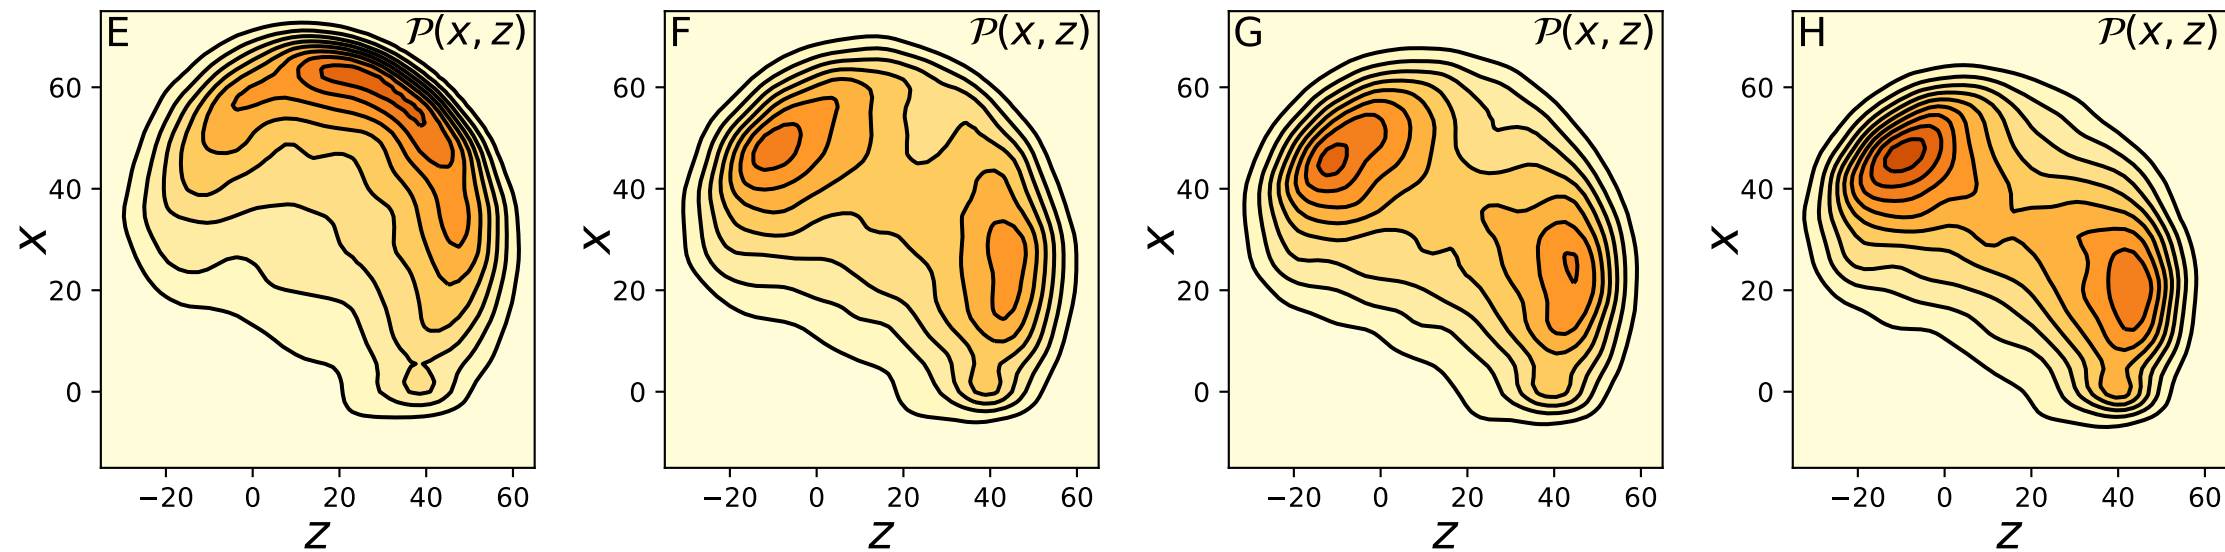

# Experiment

(Andrecka et al., 2015)

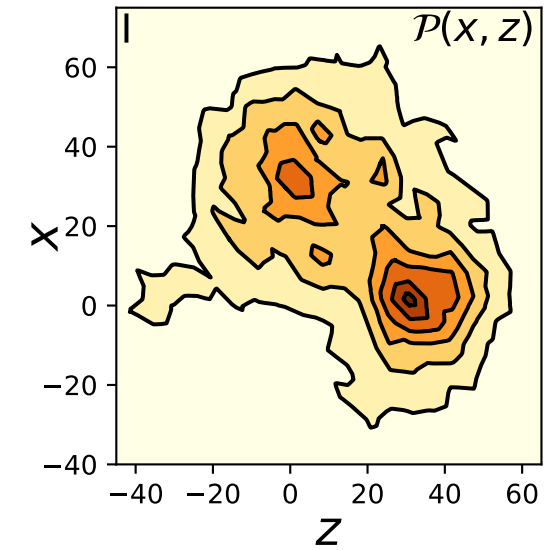

Supplement: supp [file elife-51569-supp-v1.zip]

A

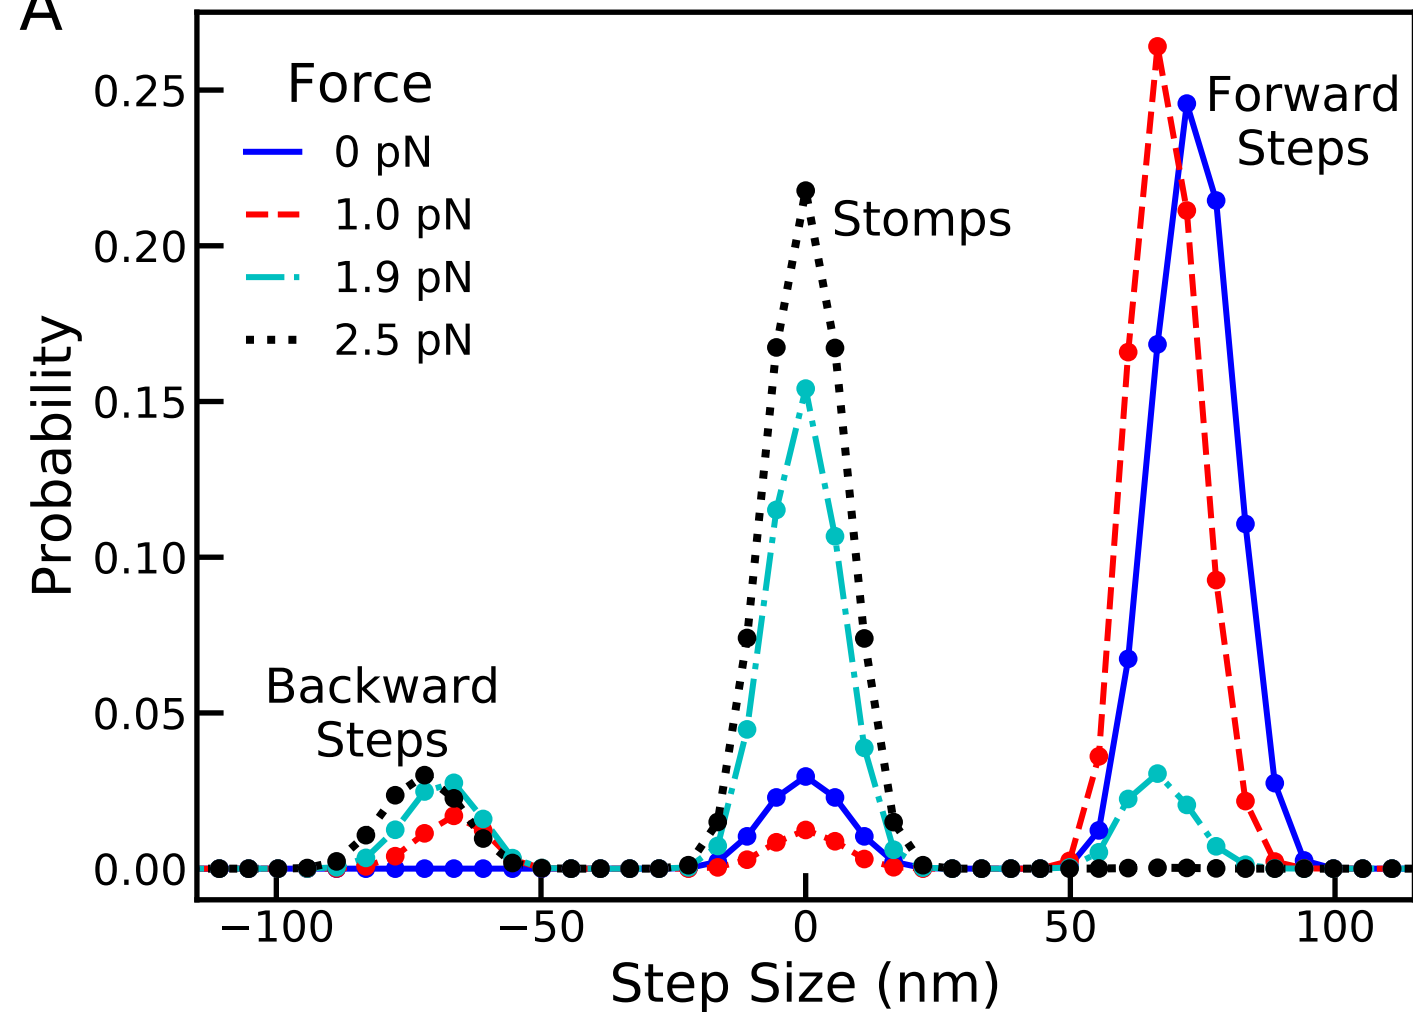

B

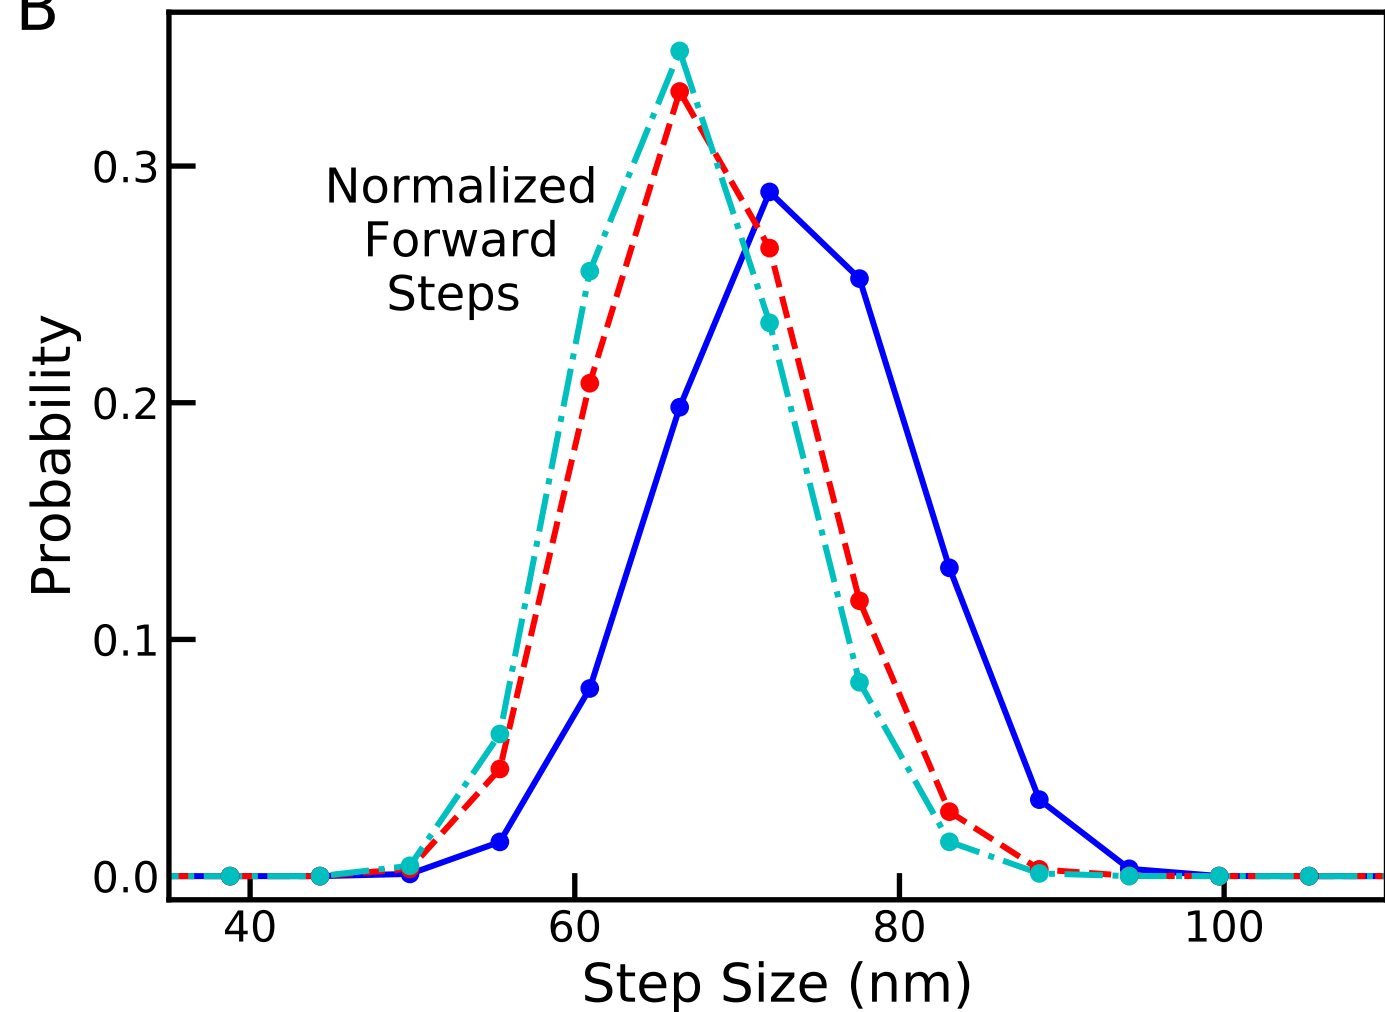

Supplement: supp [file elife-51569-supp-v1.zip]

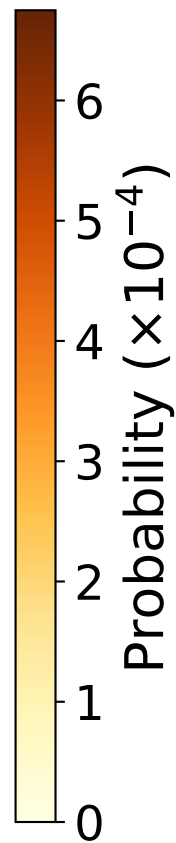

Supplement: supp [file elife-51569-supp-v1.zip]

# Analytical Theory

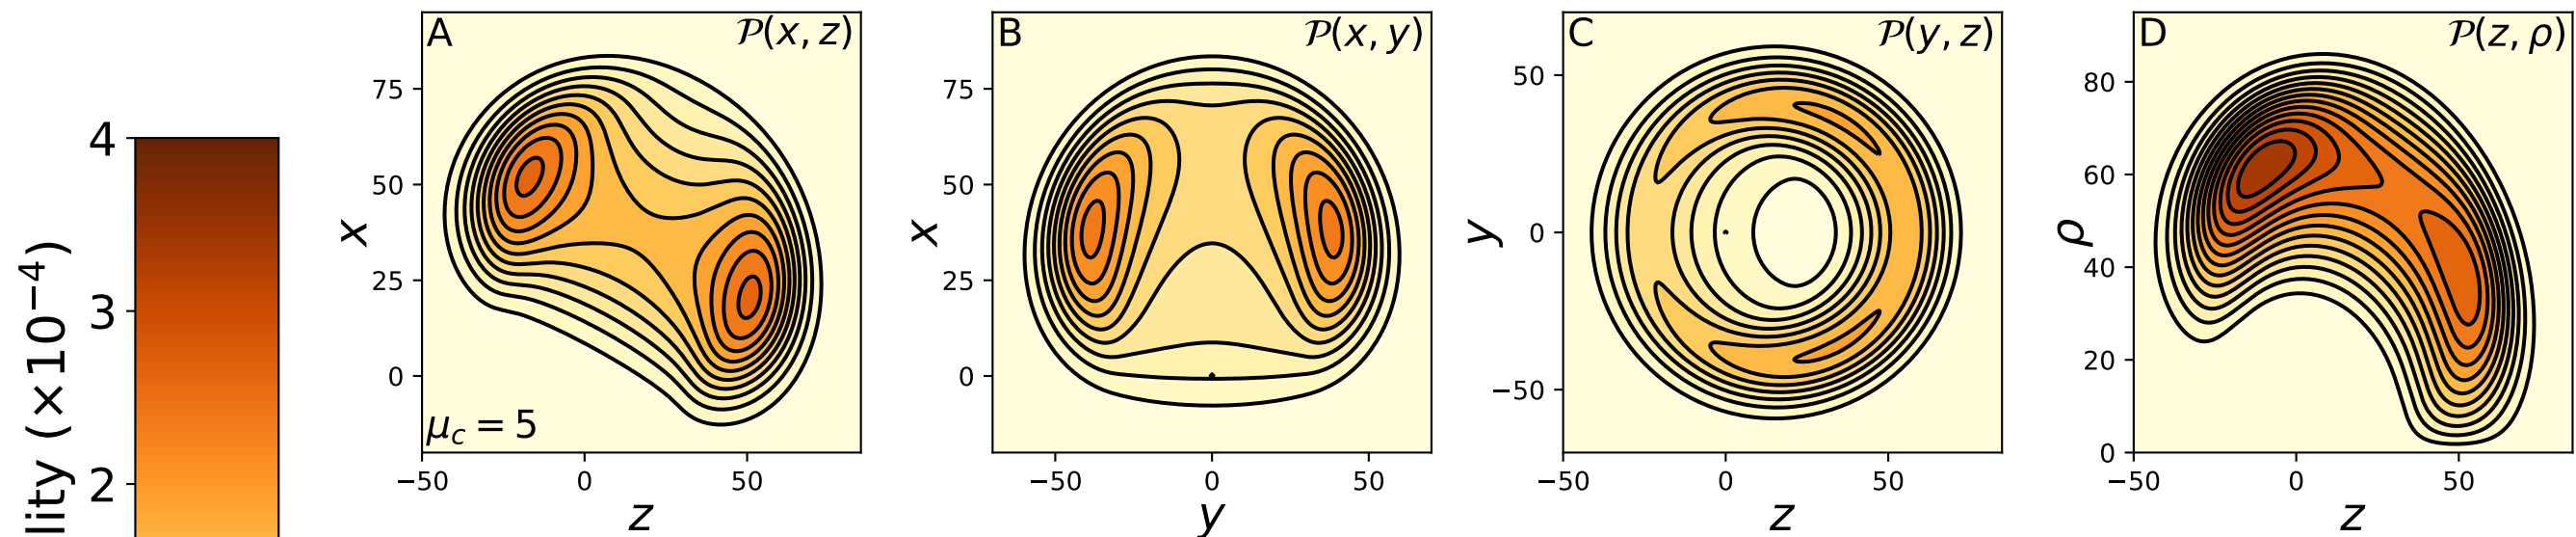

# Brownian Dynamics Simulations

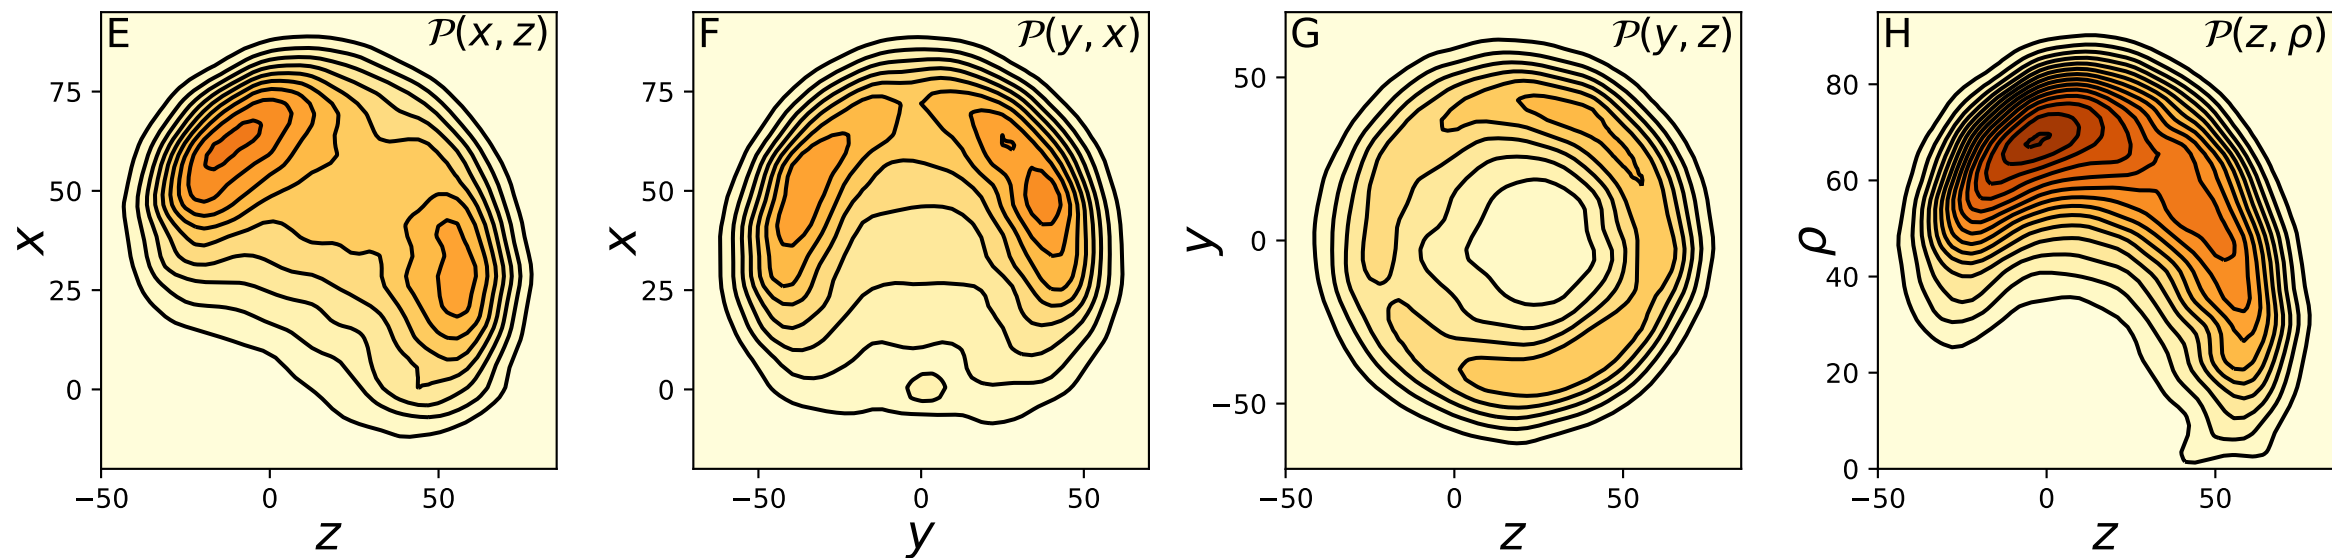

Supplement: supp [file elife-51569-supp-v1.zip]

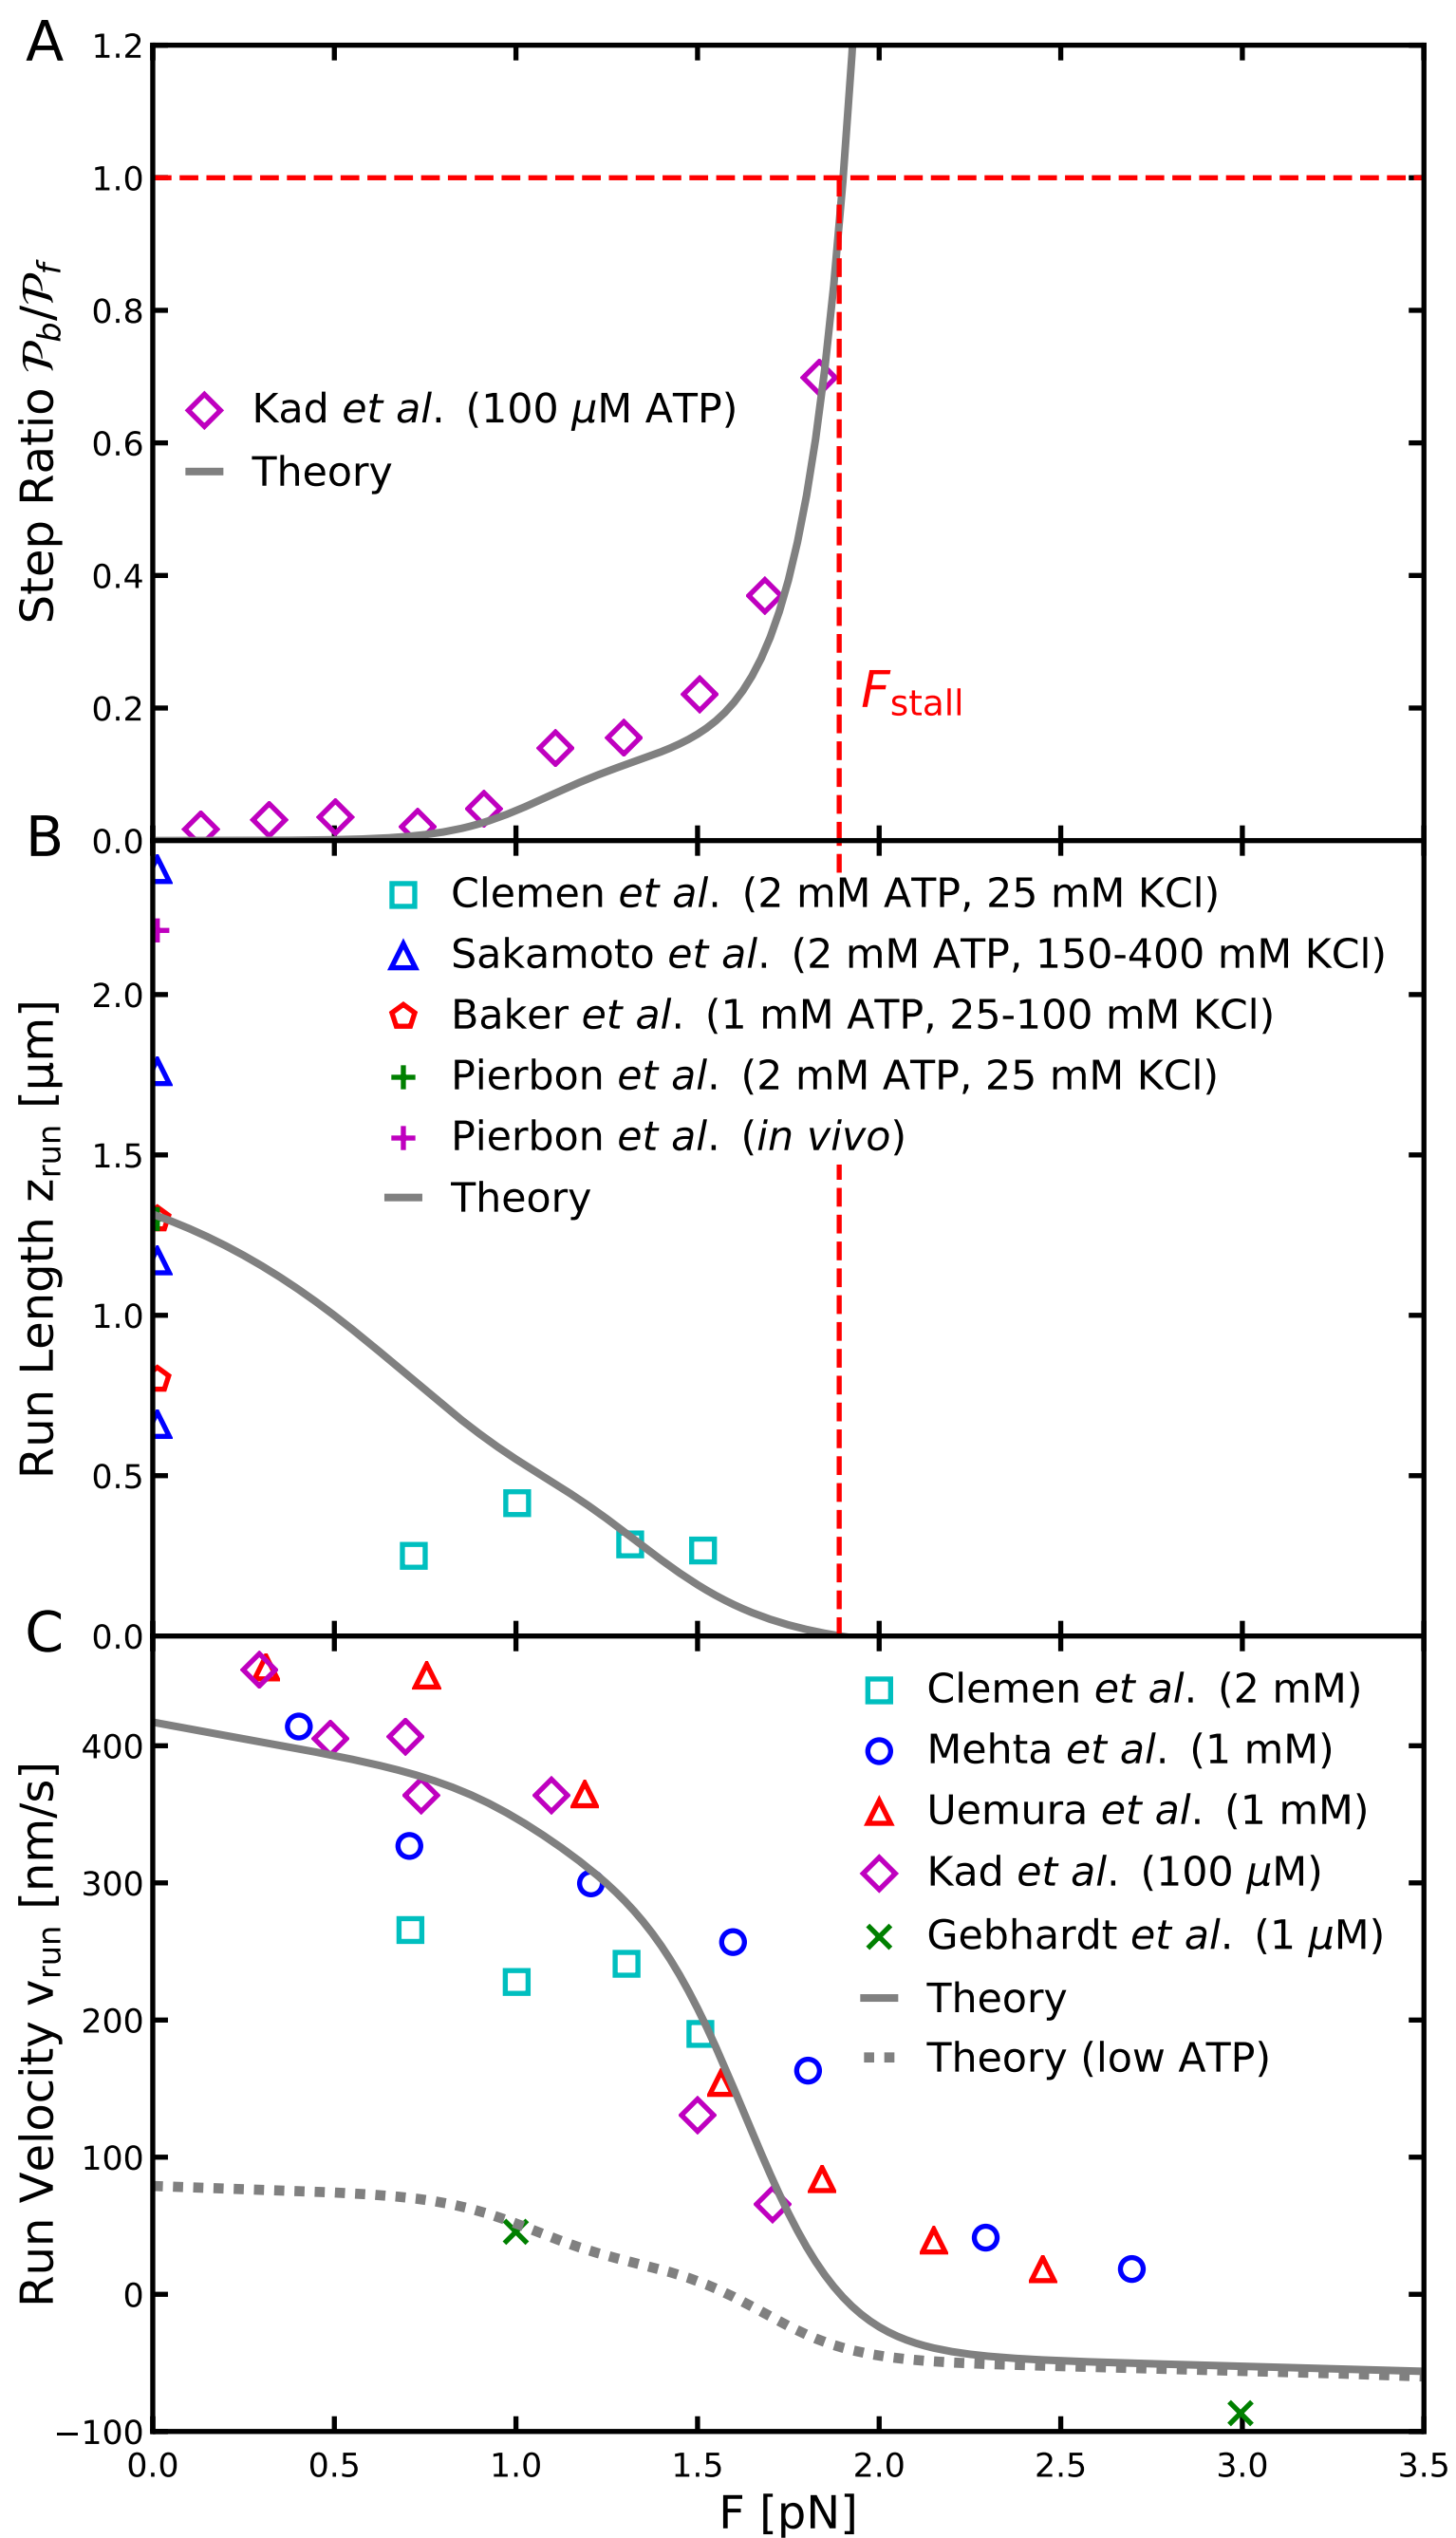

Supplement: supp [file elife-51569-supp-v1.zip]

# Analytical Theory

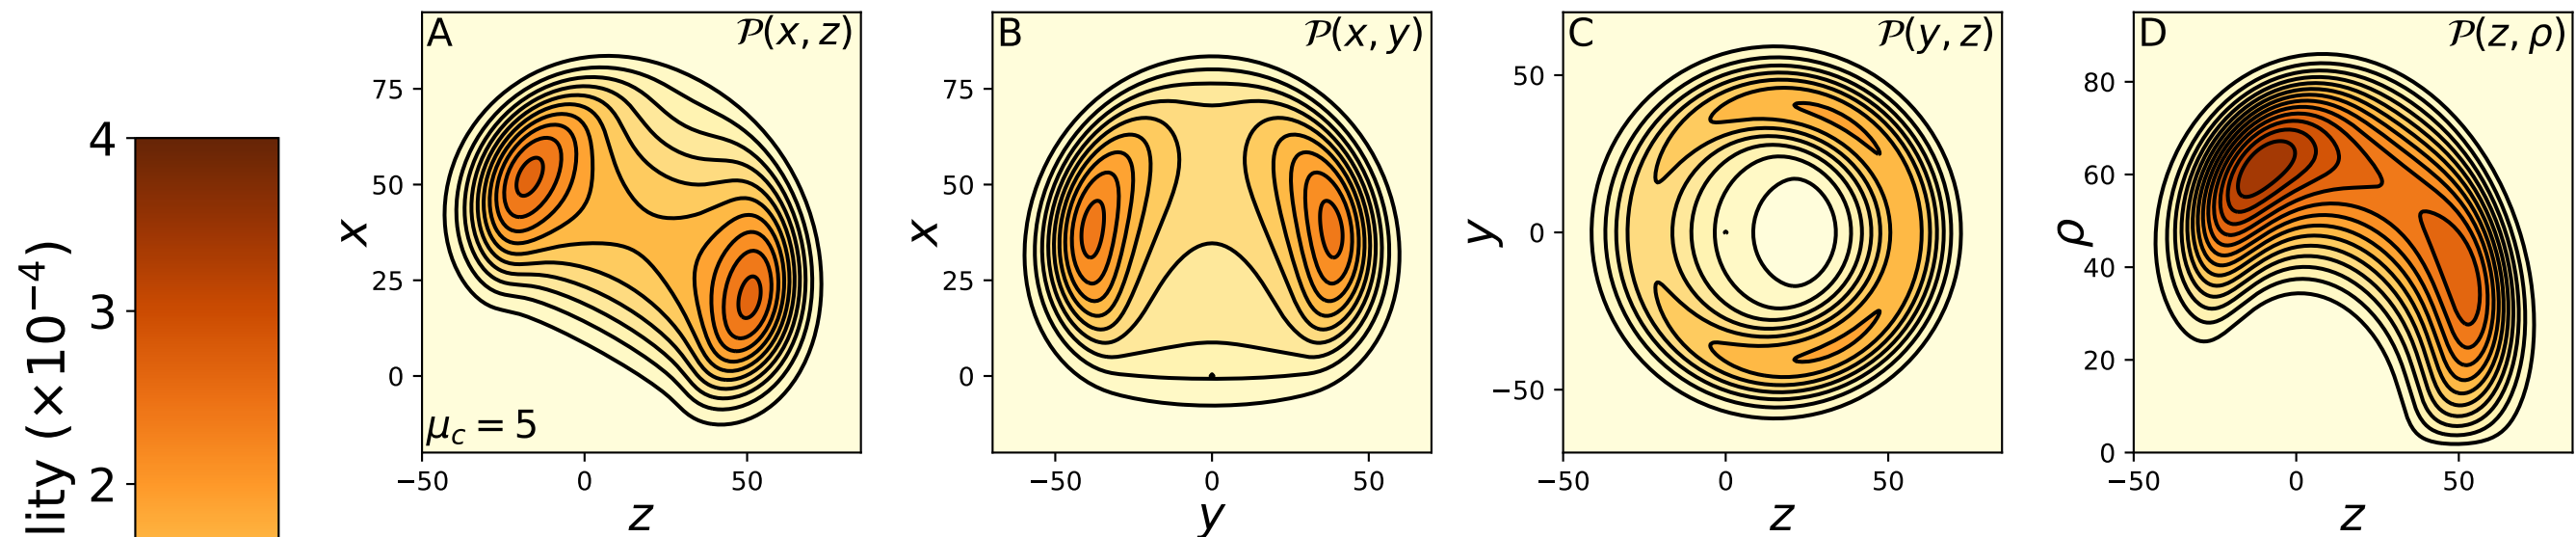

# Brownian Dynamics Simulations

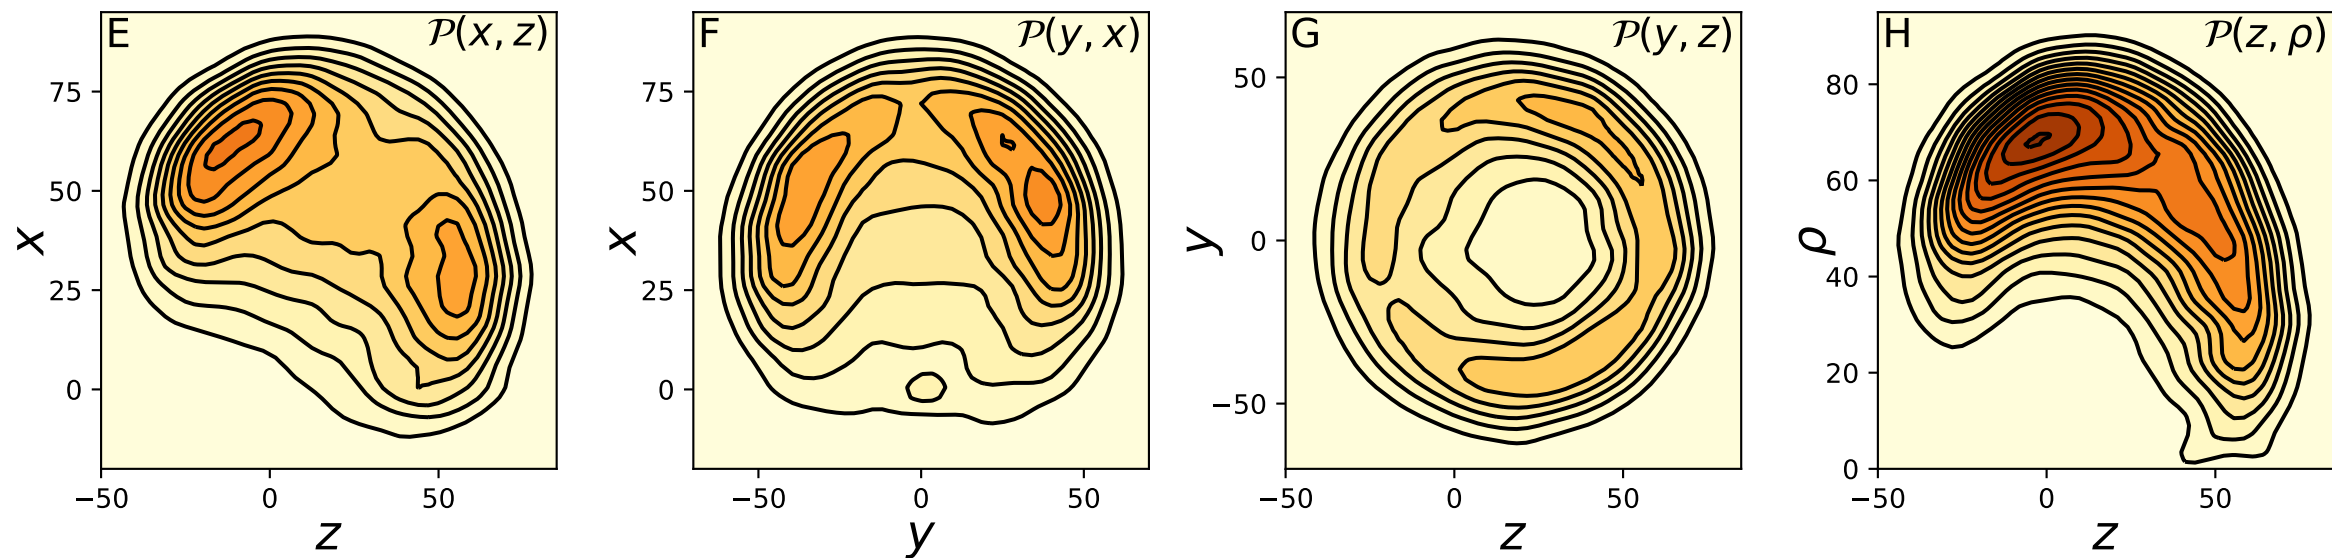

Supplement: supp [file elife-51569-supp-v1.zip]



Supplement: supp [file elife-51569-supp-v1.zip]

# Analytical Theory

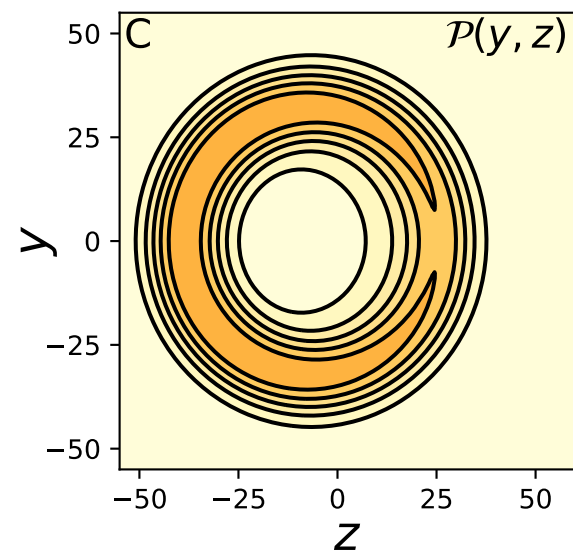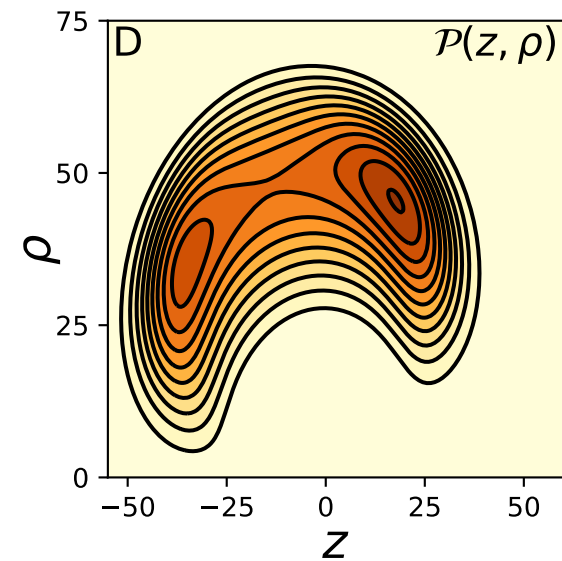

# Brownian Dynamics Simulations

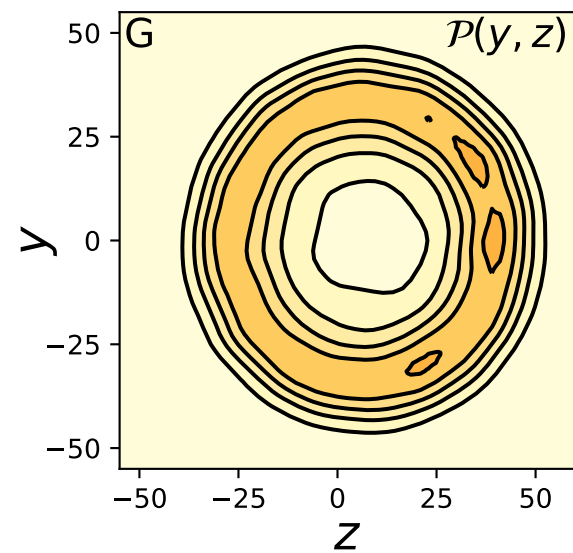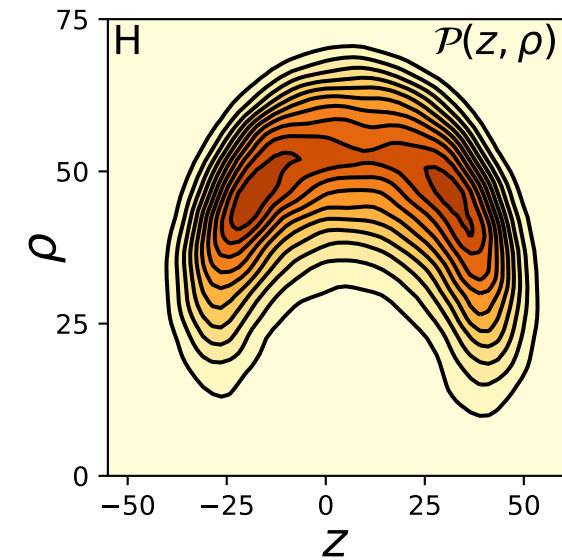

Supplement: supp [file elife-51569-supp-v1.zip]
